# Supplementary material for: Phomoidrides E–G, three dimeric anhydrides from the fungus Pleosporales sp. give new insight to the biosynthesis of phomoidrides
Source: Royal Society of Chemistry journal article supplement (doi:10.1039/d1qo01119g), 2021-01-01
Supplement: d1qo01119g1.pdf [file d1qo01119g1.pdf]

## Supporting Information

### **Phomoidrides E–G, Three Dimeric Anhydrides from the Fungus *Pleosporales* sp. Give New Insight to the Biosynthesis of Phomoidrides**

Lihua Zhang,<sup>a,b</sup> Yanan Wang,<sup>a</sup> Le Zhang,<sup>a</sup> Bingyu Liu,<sup>a</sup> Chen Zhang,<sup>a</sup> Daojiang Yan,<sup>a</sup> Jian Bai,<sup>\*a</sup> and Youcai Hu<sup>\*a</sup>

<sup>a</sup> State Key Laboratory of Bioactive Substance and Function of Natural Medicines, Institute of Materia Medica, Chinese Academy of Medical Sciences & Peking Union Medical College, Beijing 100050, P.R. China

<sup>b</sup> Current address: State Key Laboratory of Component-Based Chinese Medicine, Tianjin Key Laboratory of TCM Chemistry and Analysis, Institute of Traditional Chinese Medicine, Tianjin University of Traditional Chinese Medicine, Tianjin 300193, P.R. China

\*Corresponding authors

Tel.: +86-10-83162679

Email: [baijian@imm.ac.cn](mailto:baijian@imm.ac.cn)

[huyoucai@imm.ac.cn](mailto:huyoucai@imm.ac.cn)

---

## Contents

|                                                                                                                                     |    |
|-------------------------------------------------------------------------------------------------------------------------------------|----|
| Table S1. Predicted functions of genes in the <i>phi</i> gene cluster. ....                                                         | 4  |
| Table S2. Energies of conformers for <b>1</b> and <b>2</b> at MMFF94 force field. ....                                              | 5  |
| Fig. S1. The internal transcribed spacer identification of <i>Pleosporales</i> sp. ....                                             | 7  |
| Fig. S2. Structure analysis of PhiK by Phyre2 showed PhiK is close to CytC3 with Fe <sup>II</sup> and $\alpha$ -ketoglutarate ..... | 7  |
| Fig. S3. <sup>1</sup> H NMR (600 MHz, CDCl <sub>3</sub> ) spectrum for <b>1</b> .....                                               | 8  |
| Fig. S4. <sup>13</sup> C NMR (150 MHz, CDCl <sub>3</sub> ) spectrum for <b>1</b> .....                                              | 8  |
| Fig. S5. HSQC (600 MHz, CDCl <sub>3</sub> ) spectrum for <b>1</b> .....                                                             | 9  |
| Fig. S6. <sup>1</sup> H- <sup>1</sup> H COSY (600 MHz, CDCl <sub>3</sub> ) spectrum for <b>1</b> .....                              | 9  |
| Fig. S7. HMBC (600 MHz, CDCl <sub>3</sub> ) spectrum for <b>1</b> .....                                                             | 10 |
| Fig. S8. NOESY (600 MHz, CDCl <sub>3</sub> ) spectrum for <b>1</b> .....                                                            | 10 |
| Fig. S9. HR-ESI-MS spectrum for <b>1</b> .....                                                                                      | 11 |
| Fig. S10. UV spectrum for <b>1</b> in CH <sub>3</sub> CN .....                                                                      | 12 |
| Fig. S11. CD spectrum for <b>1</b> in CH <sub>3</sub> CN .....                                                                      | 12 |
| Fig. S12. <sup>1</sup> H NMR (700 MHz, DMSO- <i>d</i> <sub>6</sub> ) spectrum for <b>1</b> . ....                                   | 13 |
| Fig. S13. <sup>13</sup> C NMR (175 MHz, DMSO- <i>d</i> <sub>6</sub> ) spectrum for <b>1</b> . ....                                  | 13 |
| Fig. S14. HSQC (700 MHz, DMSO- <i>d</i> <sub>6</sub> ) spectrum for <b>1</b> . ....                                                 | 14 |
| Fig. S15. HMBC (700 MHz, DMSO- <i>d</i> <sub>6</sub> ) spectrum for <b>1</b> .....                                                  | 14 |
| Fig. S16. NOESY (700 MHz, DMSO- <i>d</i> <sub>6</sub> ) spectrum for <b>1</b> .....                                                 | 15 |
| Fig. S17. <sup>1</sup> H NMR (600 MHz, Acetone- <i>d</i> <sub>6</sub> ) spectrum for <b>2</b> .....                                 | 15 |
| Fig. S18. <sup>13</sup> C NMR (150 MHz, Acetone- <i>d</i> <sub>6</sub> ) spectrum for <b>2</b> .....                                | 16 |
| Fig. S19. HSQC (600 MHz, Acetone- <i>d</i> <sub>6</sub> ) spectrum for <b>2</b> .....                                               | 16 |
| Fig. S20. <sup>1</sup> H- <sup>1</sup> H COSY (600 MHz, Acetone- <i>d</i> <sub>6</sub> ) spectrum for <b>2</b> .....                | 17 |
| Fig. S21. HMBC (600 MHz, Acetone- <i>d</i> <sub>6</sub> ) spectrum for <b>2</b> .....                                               | 17 |
| Fig. S22. NOESY (600 MHz, Acetone- <i>d</i> <sub>6</sub> ) spectrum for <b>2</b> .....                                              | 18 |
| Fig. S23. HR-ESI-MS spectrum for <b>2</b> .....                                                                                     | 19 |
| Fig. S24. UV spectrum for <b>2</b> in CH <sub>3</sub> CN .....                                                                      | 20 |
| Fig. S25. CD spectrum for <b>2</b> in CH <sub>3</sub> CN .....                                                                      | 20 |
| Fig. S26. <sup>1</sup> H NMR (600 MHz, Acetone- <i>d</i> <sub>6</sub> ) spectrum for <b>3</b> .....                                 | 21 |
| Fig. S27. <sup>13</sup> C NMR (150 MHz, Acetone- <i>d</i> <sub>6</sub> ) spectrum for <b>3</b> .....                                | 21 |
| Fig. S28 HSQC (600 MHz, Acetone- <i>d</i> <sub>6</sub> ) spectrum for <b>3</b> .....                                                | 22 |
| Fig. S29. <sup>1</sup> H- <sup>1</sup> H COSY (600 MHz, Acetone- <i>d</i> <sub>6</sub> ) spectrum for <b>3</b> .....                | 22 |

|                                                                                                          |    |
|----------------------------------------------------------------------------------------------------------|----|
| Fig. S30. HMBC (600 MHz, Acetone- <i>d</i> <sub>6</sub> ) spectrum for <b>3</b> .....                    | 23 |
| Fig. S31. NOESY (600 MHz, Acetone- <i>d</i> <sub>6</sub> ) spectrum for <b>3</b> .....                   | 23 |
| Fig. S32. HR-ESI-MS spectrum for <b>3</b> .....                                                          | 24 |
| Fig. S33. UV spectrum for <b>3</b> in CH <sub>3</sub> CN .....                                           | 25 |
| Fig. S34. CD spectrum for <b>3</b> in CH <sub>3</sub> CN.....                                            | 25 |
| Fig. S35. <sup>1</sup> H NMR (600 MHz, Aceton- <i>d</i> <sub>6</sub> ) spectrum for Phomoidride A.....   | 26 |
| Fig. S37. <sup>13</sup> C NMR (150 MHz, Aceton- <i>d</i> <sub>6</sub> ) spectrum for Phomoidride A.....  | 26 |
| Fig. S38. UV spectrum for Phomoidride A in CH <sub>3</sub> CN.....                                       | 27 |
| Fig. S39. CD spectrum for Phomoidride A in CH <sub>3</sub> CN .....                                      | 27 |
| Fig. S40. <sup>1</sup> H NMR (600 MHz, Aceton- <i>d</i> <sub>6</sub> ) spectrum for Phomoidride B .....  | 28 |
| Fig. S41. <sup>13</sup> C NMR (150 MHz, Aceton- <i>d</i> <sub>6</sub> ) spectrum for Phomoidride B.....  | 28 |
| Fig. S42. UV spectrum for Phomoidride B in CH <sub>3</sub> CN.....                                       | 29 |
| Fig. S43. CD spectrum for Phomoidride B in CH <sub>3</sub> CN .....                                      | 29 |
| Fig. S44. <sup>1</sup> H NMR (600 MHz, Aceton- <i>d</i> <sub>6</sub> ) spectrum for Phomoidride C .....  | 30 |
| Fig. S45. <sup>13</sup> C NMR (150 MHz, Aceton- <i>d</i> <sub>6</sub> ) spectrum for Phomoidride C.....  | 30 |
| Fig. S46. UV spectrum for Phomoidride C in CH <sub>3</sub> CN.....                                       | 31 |
| Fig. S47. <sup>1</sup> H NMR (600 MHz, Aceton- <i>d</i> <sub>6</sub> ) spectrum for Phomoidride D.....   | 31 |
| Fig. S48. <sup>13</sup> C NMR (150 MHz, Aceton- <i>d</i> <sub>6</sub> ) spectrum for Phomoidride D.....  | 32 |
| Fig. S49. UV spectrum for Phomoidride D in CH <sub>3</sub> CN.....                                       | 32 |
| Fig. S50. 3D conformers and energies of <b>1</b> and <b>2</b> at B3LYP/6-31G(d) level in gas phase. .... | 33 |

Table S1. Predicted functions of genes in the *phi* gene cluster.

| Gene        | Size (protein) | Predicted functions                                                | Identities(%) /positives(%) | BlastP Homolog |
|-------------|----------------|--------------------------------------------------------------------|-----------------------------|----------------|
| <i>phiP</i> | 508            | MFS transporter                                                    | 100/76                      | XP_018070357.1 |
| <i>phiQ</i> | 507            | FMN binding Oxidoreductase                                         | 100/82                      | XP_018031531.1 |
| <i>phiR</i> | 159            | hypothetical protein                                               | 50/37                       | Q96S38.2       |
| <i>phiS</i> | 614            | Sulfatase/Arylsulfatase                                            | 90/43                       | KXH36502.1     |
| <i>phiT</i> | 326            | hypothetical protein                                               | 18/47                       | XP_023065433.1 |
| <i>phiU</i> | 403            | methyltransferase                                                  | 98/56                       | ORY13414.1     |
| <i>phiA</i> | 2591           | PKS [KS, AT, DH, MT, ER, KR, ACP]                                  | 99/71                       | ADA79525.1     |
| <i>phiB</i> | 208            | PEBP superfamily                                                   | 98/63                       | XP_002485358.1 |
| <i>phiC</i> | 226            | ketosteroid isomerase-like protein                                 | 89/40                       | ANF07278.1     |
| <i>phiD</i> | 659            | MFS multidrug transporter                                          | 81/60                       | XP_002485360.1 |
| <i>phiE</i> | 300            | methyltransferase                                                  | 95/61                       | XP_002485361.1 |
| <i>phiF</i> | 301            | DUF1115 domain protein                                             | 96/44                       | XP_001259206.1 |
| <i>phiG</i> | 336            | alpha/beta-hydrolase                                               | 89/64                       | XP_001800751.1 |
| <i>phiH</i> | 279            | hypothetical protein                                               | 87/37                       | OTA92757.1     |
| <i>phiI</i> | 504            | 2-methylcitrate dehydratase                                        | 96/62                       | EDP54866.1     |
| <i>phiJ</i> | 457            | citrate synthase                                                   | 94/59                       | XP_002485362.1 |
| <i>phiK</i> | 276            | alpha-ketoglutarate-dependent taurine dioxygenase ( $\alpha$ -KGD) | 100/63                      | XP_002485367.1 |
| <i>phiL</i> | 423            | MFS transporter                                                    | 97/61                       | XP_002485366.1 |
| <i>phiM</i> | 224            | FSH1/DUF341 family hydrolase                                       | 99/48                       | XP_002485365.1 |
| <i>phiN</i> | 259            | PEBP superfamily                                                   | 55/45                       | ANF07283.1     |
| <i>phiO</i> | 342            | C6 transcription factor                                            | 97/29                       | ANF07281.1     |

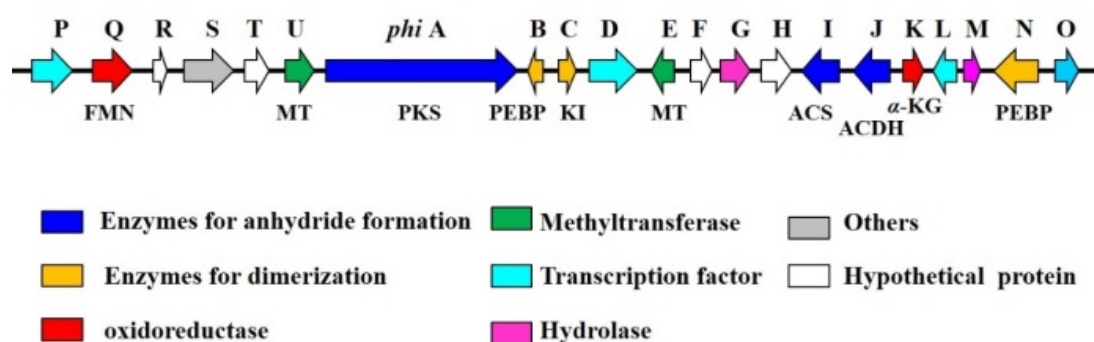

Table S2. Energies of conformers for **1** and **2** at MMFF94 force field.

| Compound | Conformer | Energy (kcal/mol) | Population (%) |
|----------|-----------|-------------------|----------------|
| 1        | 1         | 38.85             | 56.2           |
| 1        | 2         | 39.77             | 11.9           |
| 1        | 3         | 39.78             | 11.7           |
| 1        | 4         | 40.34             | 4.5            |
| 1        | 5         | 40.43             | 3.9            |
| 1        | 6         | 40.57             | 3.1            |
| 1        | 7         | 40.62             | 2.8            |
| 1        | 8         | 41.05             | 1.4            |
| 1        | 9         | 41.29             | 0.9            |
| 1        | 10        | 41.31             | 0.9            |
| 1        | 11        | 41.57             | 0.6            |
| 1        | 12        | 41.64             | 0.5            |
| 1        | 13        | 41.72             | 0.4            |
| 1        | 14        | 42.1              | 0.2            |
| 1        | 15        | 42.34             | 0.2            |
| 1        | 16        | 42.38             | 0.2            |
| 1        | 17        | 42.43             | 0.1            |
| 1        | 18        | 42.63             | 0.1            |
| 1        | 19        | 42.72             | 0.1            |
| 1        | 20        | 42.72             | 0.1            |
| 2        | 1         | 103.1             | 25.7           |
| 2        | 2         | 103.11            | 25.3           |
| 2        | 3         | 103.25            | 19.9           |
| 2        | 4         | 103.94            | 6.2            |
| 2        | 5         | 104.19            | 4.1            |
| 2        | 6         | 104.34            | 3.2            |
| 2        | 7         | 104.35            | 3.1            |
| 2        | 8         | 104.48            | 2.5            |
| 2        | 9         | 104.84            | 1.4            |
| 2        | 10        | 104.87            | 1.3            |
| 2        | 11        | 104.94            | 1.2            |
| 2        | 12        | 105.15            | 0.8            |
| 2        | 13        | 105.24            | 0.7            |
| 2        | 14        | 105.46            | 0.5            |
| 2        | 15        | 105.55            | 0.4            |
| 2        | 16        | 105.59            | 0.4            |
| 2        | 17        | 105.65            | 0.4            |
| 2        | 18        | 105.7             | 0.3            |
| 2        | 19        | 105.75            | 0.3            |
| 2        | 20        | 105.81            | 0.3            |
| 2        | 21        | 105.89            | 0.2            |
| 2        | 22        | 105.94            | 0.2            |

|   |    |        |     |
|---|----|--------|-----|
| 2 | 23 | 105.98 | 0.2 |
| 2 | 24 | 106.07 | 0.2 |
| 2 | 25 | 106.1  | 0.2 |
| 2 | 26 | 106.15 | 0.2 |

---

AAGGATCATTACCAATTGCGGGCGAGGCCTAGCCTCCCCGCGAACCTTCTC  
 ATCCCTTTATGGTGTACCTTTGTTTCCTCGGCAGGCTTGCCTGCCAGCGAGG  
 ACCCCCAACAAACCTTTTTGCAGTAAGAAGTATACGTCTTATCAAAAACAA  
 ATCGTTTACAACCTTTCAACAATGGATCTCTTGGTTCTGGCATCGATGAAGAA  
 CGCAGCGAAATGCGATAAGTAGTGTGAATTGCAGAATTTAGCGAATCATCG  
 AATCTTTGAACGCACATTGCGCCTCTTGGTATTCCATGGGGCACGCCTGTTC  
 GAGCGTCATTTCAACCCTCAAGCACTGCTTGGTGTGGGGCGTCTGTCCCGC  
 CTCTGCGCGTGGACTCGCCTCAAAGTCATTGGCGGCTGTTCCCTTCGGCT  
 CGTAAGCGCAGCACAGTCAGCGCCCGGAGCTCTGGTGGATGGCGTCCAGC  
 AAGCTATATTTCTAGTCTTGACCTCGGATCAGGTGGGGATACCCGCTGAACT  
 TAAG

Fig. S1. The internal transcribed spacer identification of *Pleosporales* sp.

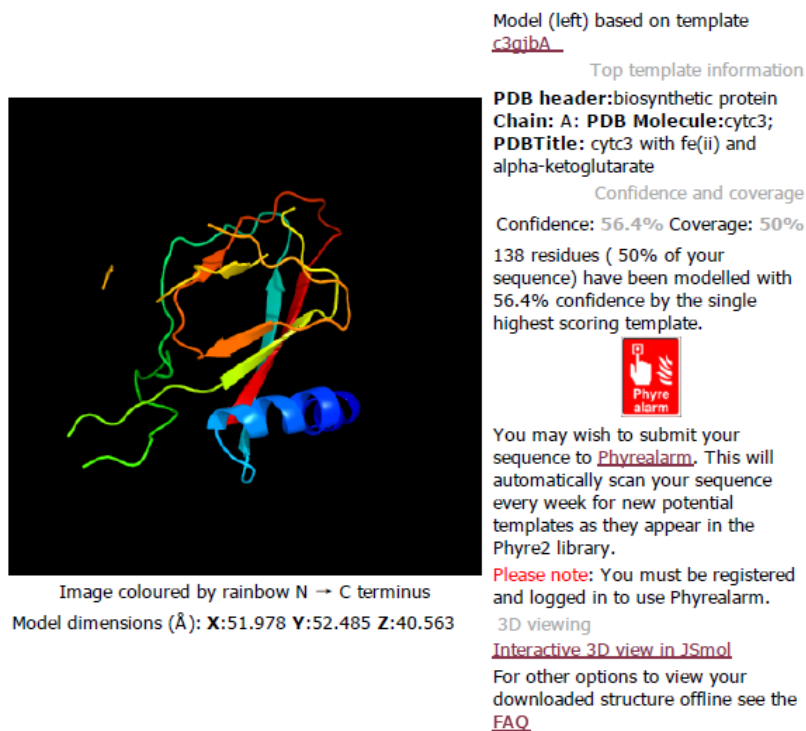

Fig. S2. Structure analysis of PhiK by Phyre2 showed PhiK is close to CytC3 with Fe<sup>II</sup> and  $\alpha$ -ketoglutarate

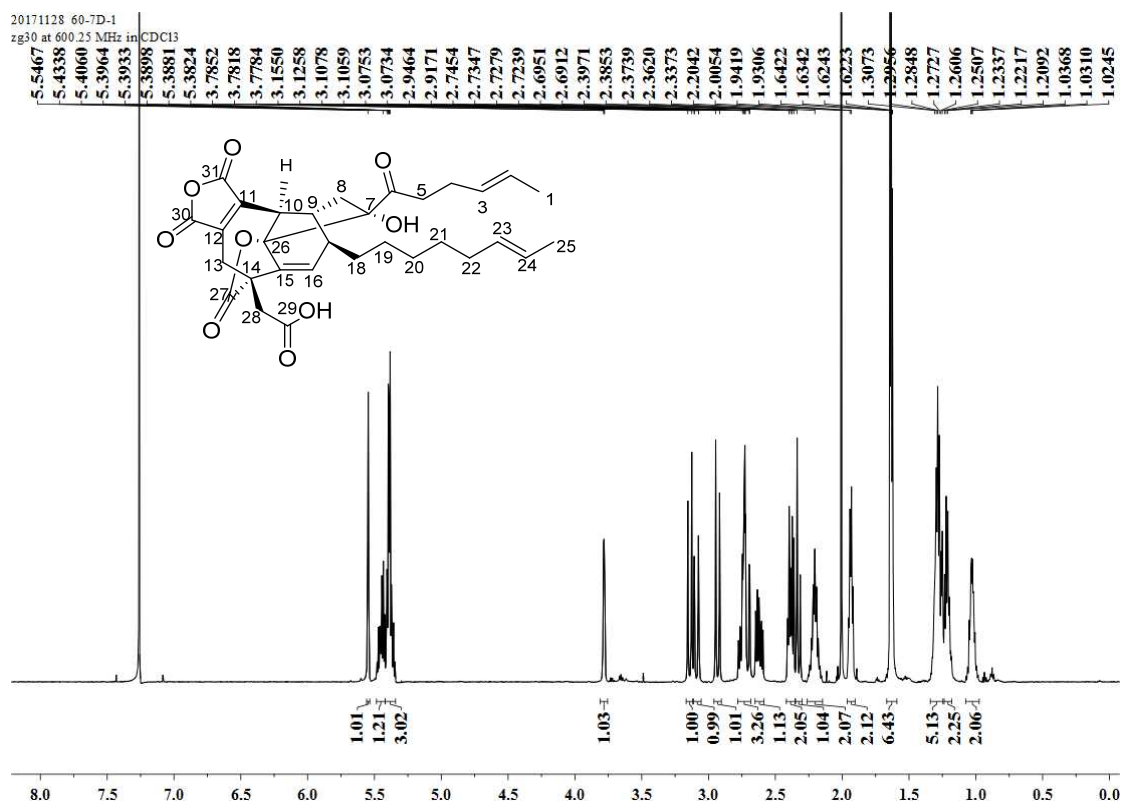

Fig. S3. <sup>1</sup>H NMR (600 MHz, CDCl<sub>3</sub>) spectrum for **1**

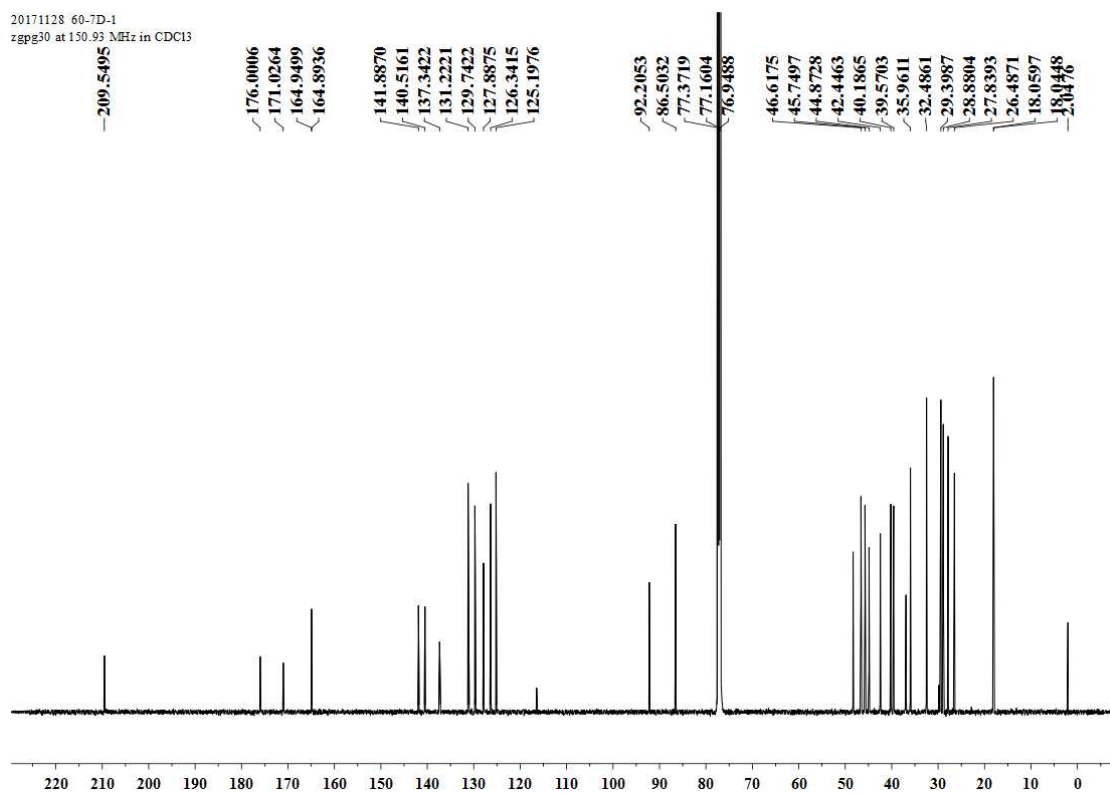

Fig. S4. <sup>13</sup>C NMR (150 MHz, CDCl<sub>3</sub>) spectrum for **1**



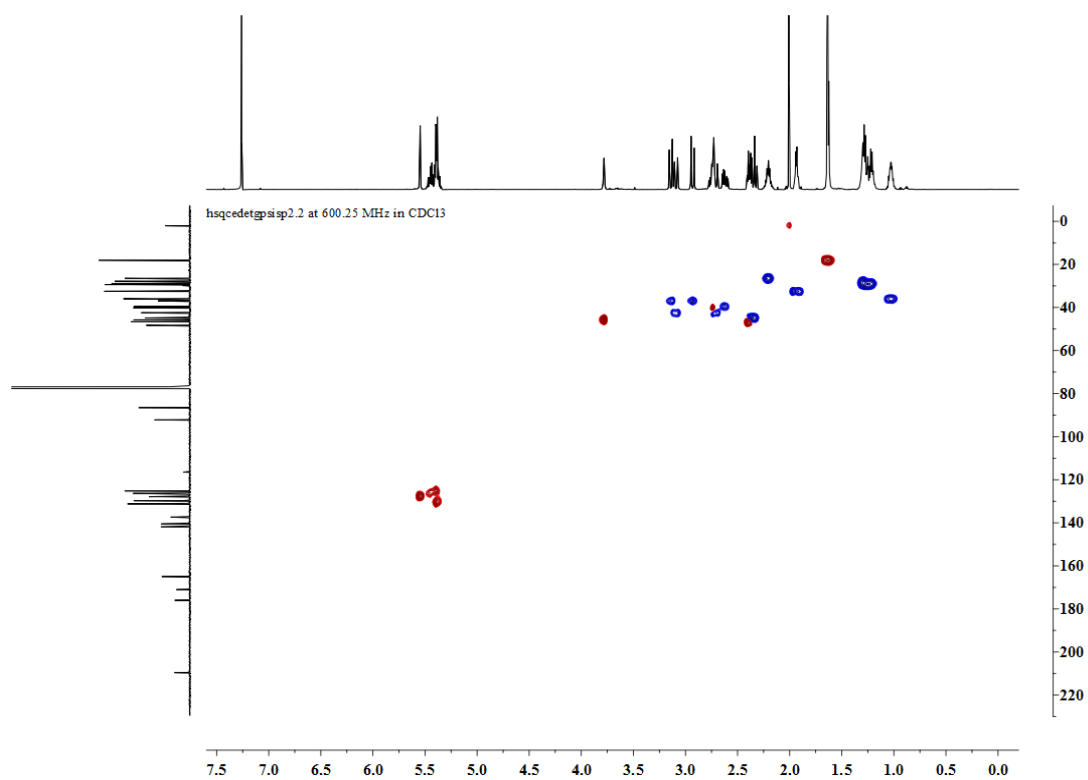

Fig. S5. HSQC (600 MHz, CDCl<sub>3</sub>) spectrum for **1**

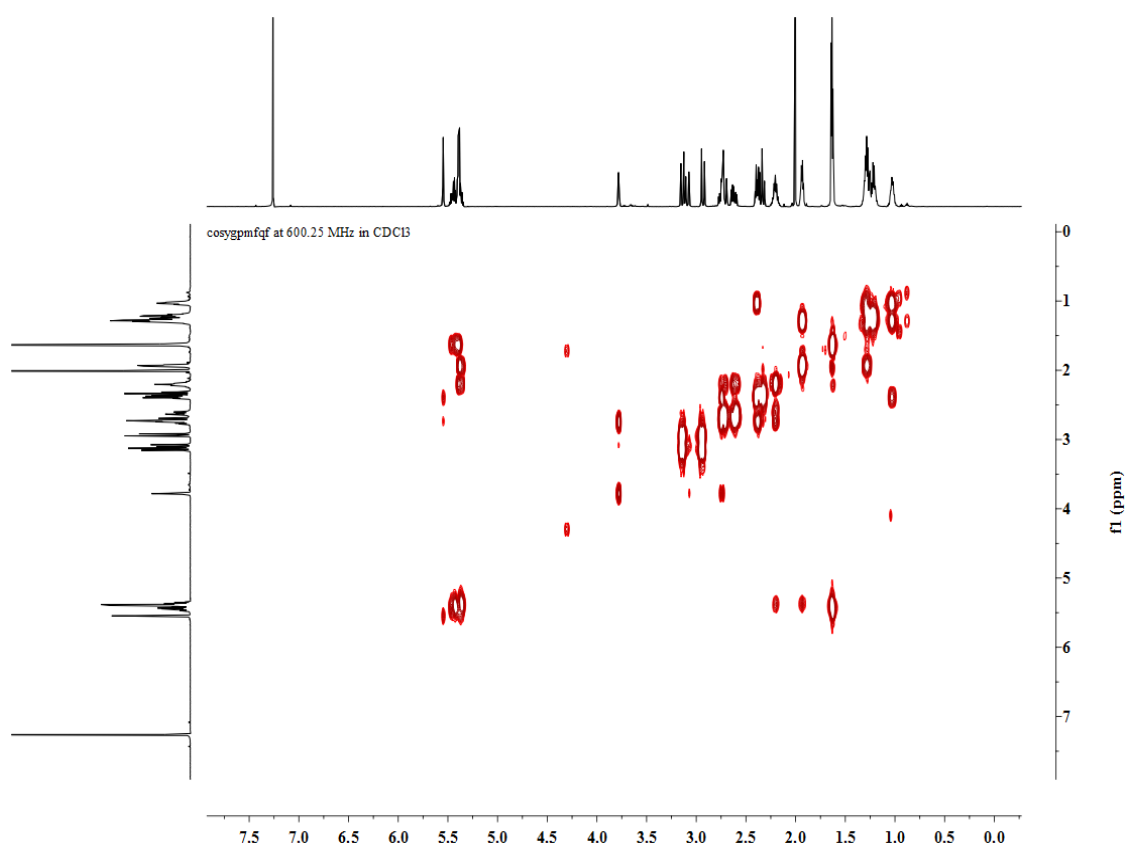

Fig. S6. <sup>1</sup>H-<sup>1</sup>H COSY (600 MHz, CDCl<sub>3</sub>) spectrum for **1**

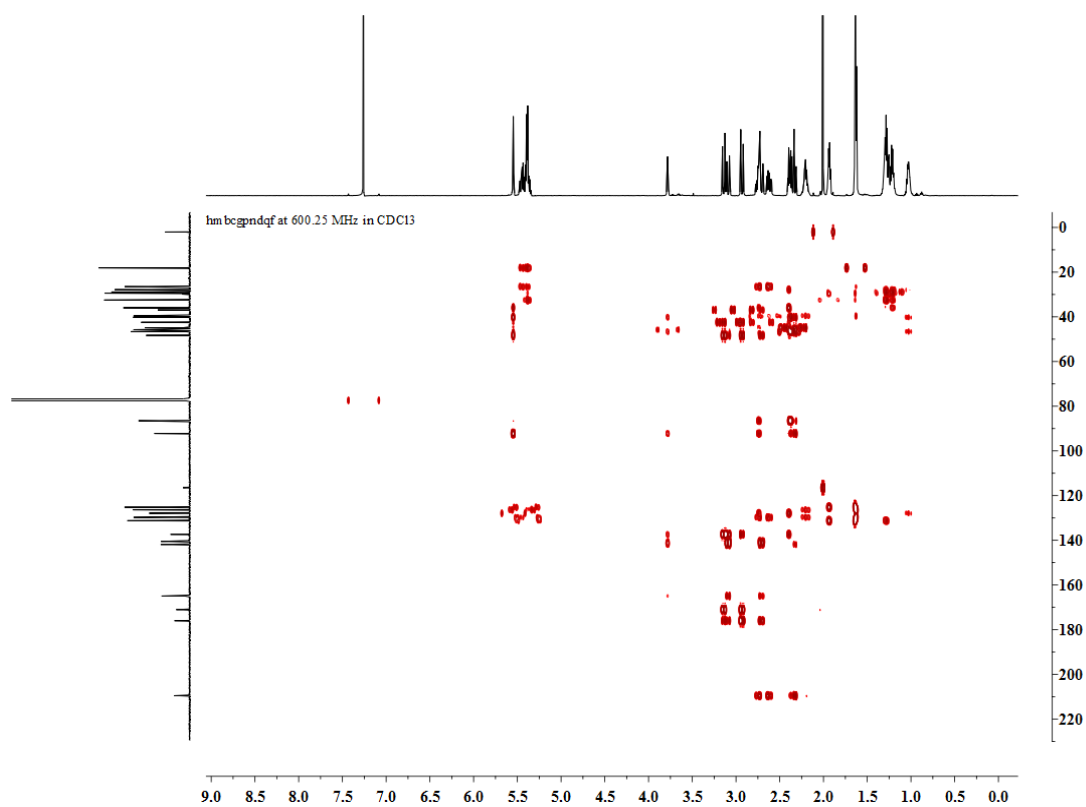

Fig. S7. HMBC (600 MHz, CDCl<sub>3</sub>) spectrum for **1**

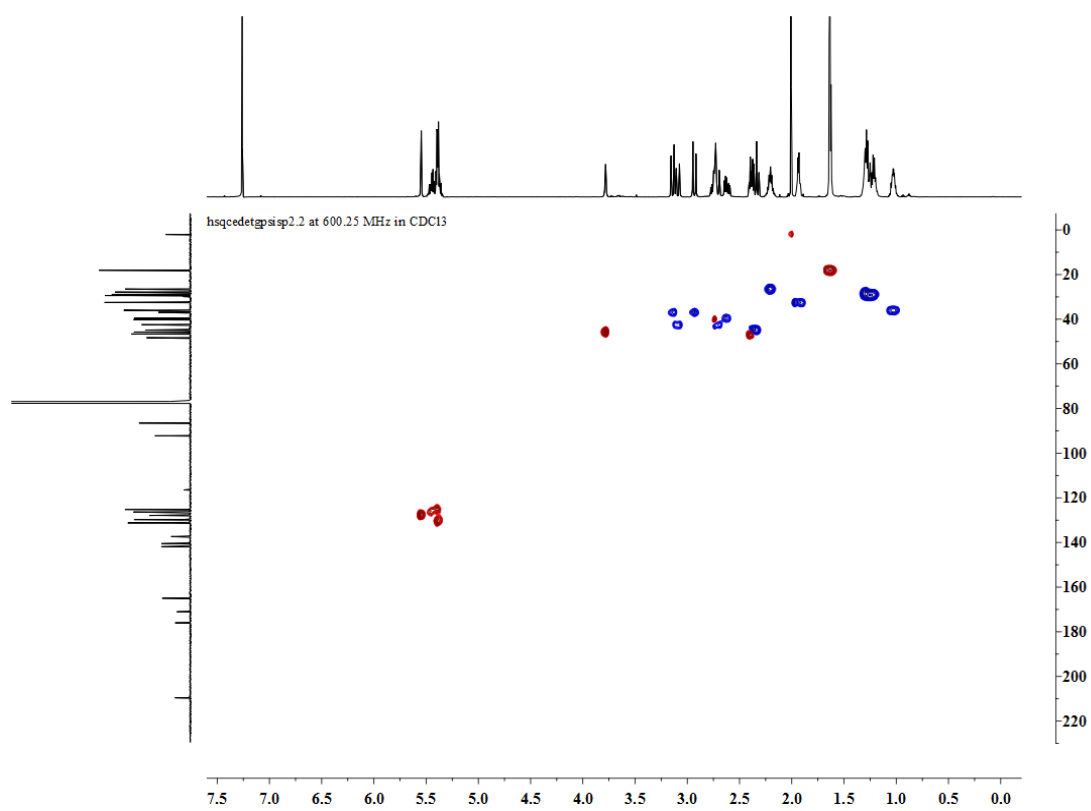

Fig. S8. NOESY (600 MHz, CDCl<sub>3</sub>) spectrum for **1**

Thermo Qexactive Focus Report

compound NO. : 60-7D-1  
 Method : LCMS(compound)-low

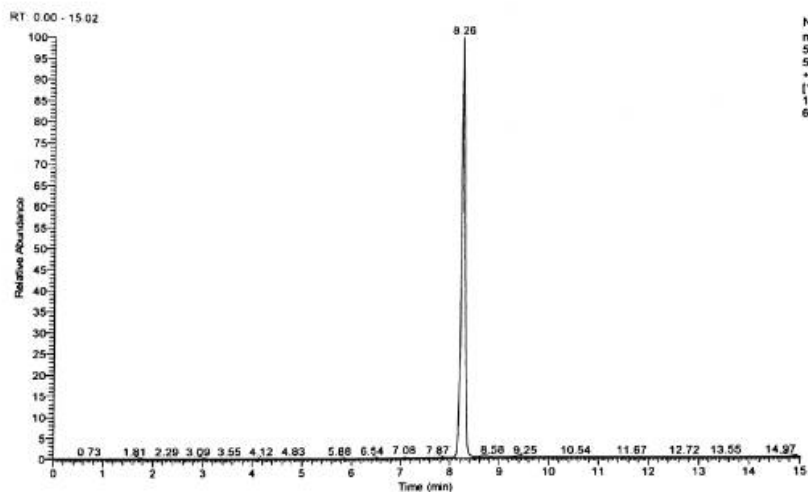

NL: 6 10E9  
 m/z= 552.74341-  
 553.74341 F: FTMS  
 + p ESI Full MS  
 [100.0000-  
 1500.0000] MS  
 60-7D-1

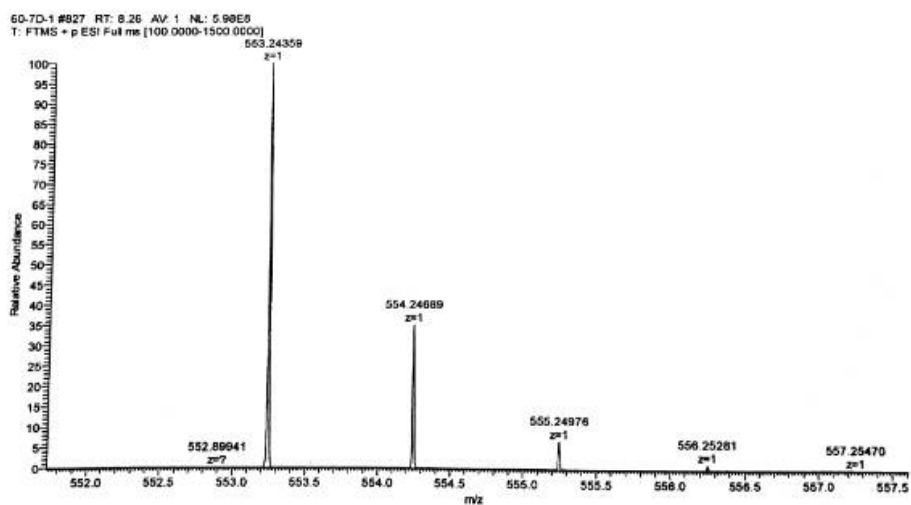

| m/z       | Theo. Mass | Delta (ppm) | RDB equiv. | Composition |     |
|-----------|------------|-------------|------------|-------------|-----|
| 553.24359 | 553.24321  | 0.69        | 13.5       | C31 H37 O9  | M+H |

Fig. S9. HR-ESI-MS spectrum for 1

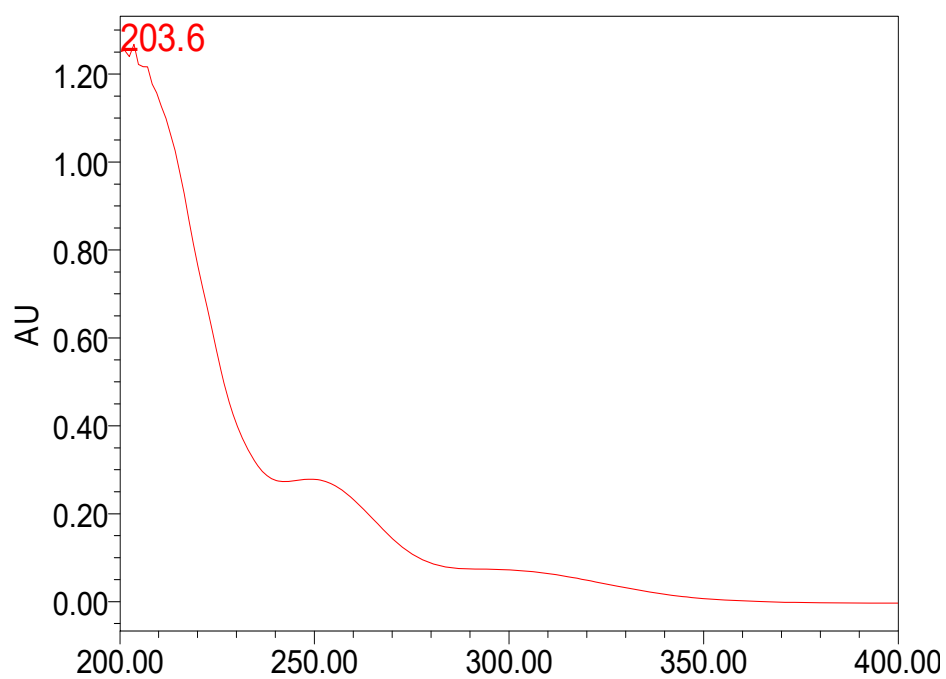

Fig. S10. UV spectrum for **1** in CH<sub>3</sub>CN

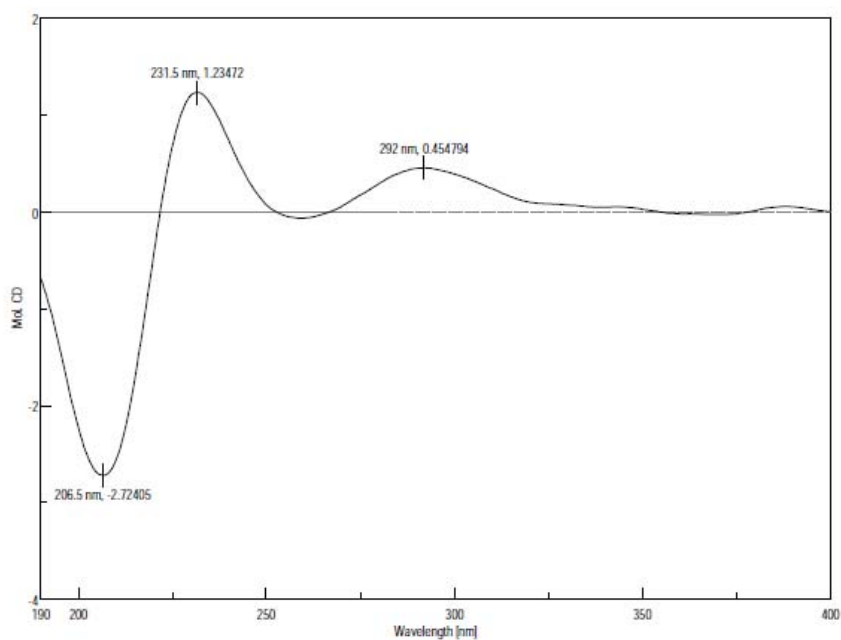

Fig. S11. CD spectrum for **1** in CH<sub>3</sub>CN

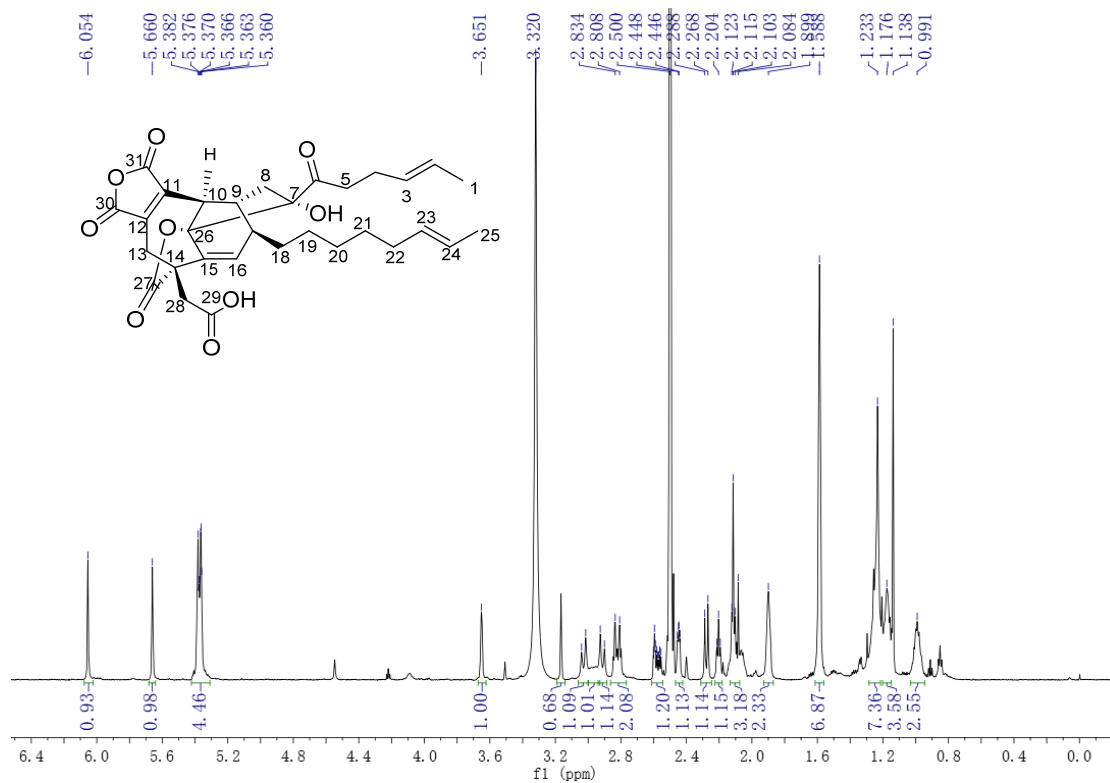

Fig. S12. <sup>1</sup>H NMR (700 MHz, DMSO-*d*<sub>6</sub>) spectrum for **1**.

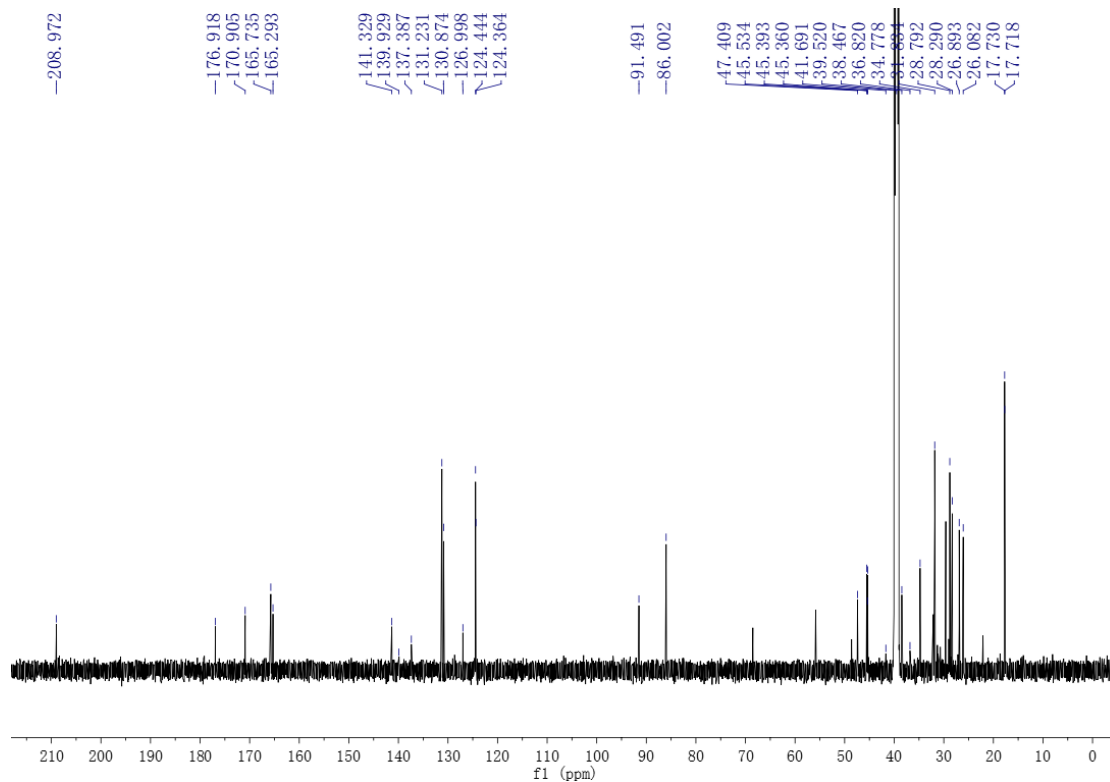

Fig. S13. <sup>13</sup>C NMR (175 MHz, DMSO-*d*<sub>6</sub>) spectrum for **1**.

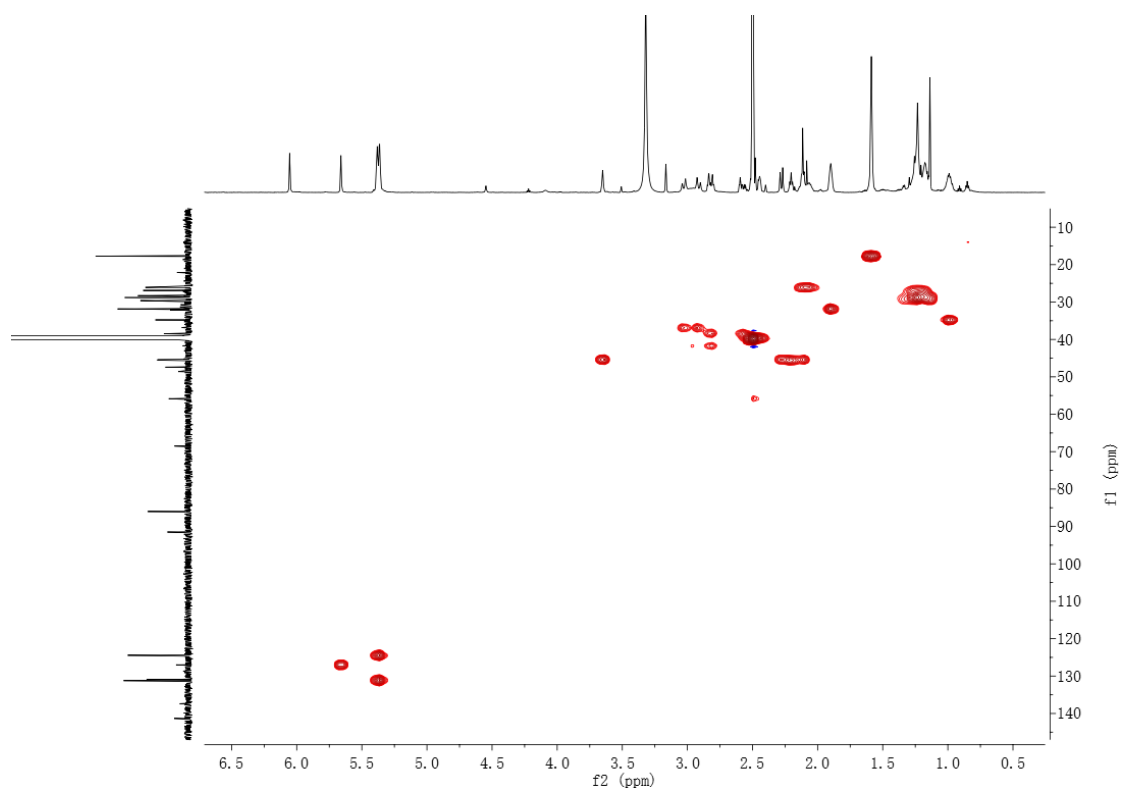

Fig. S14. HSQC (700 MHz, DMSO- $d_6$ ) spectrum for **1**.

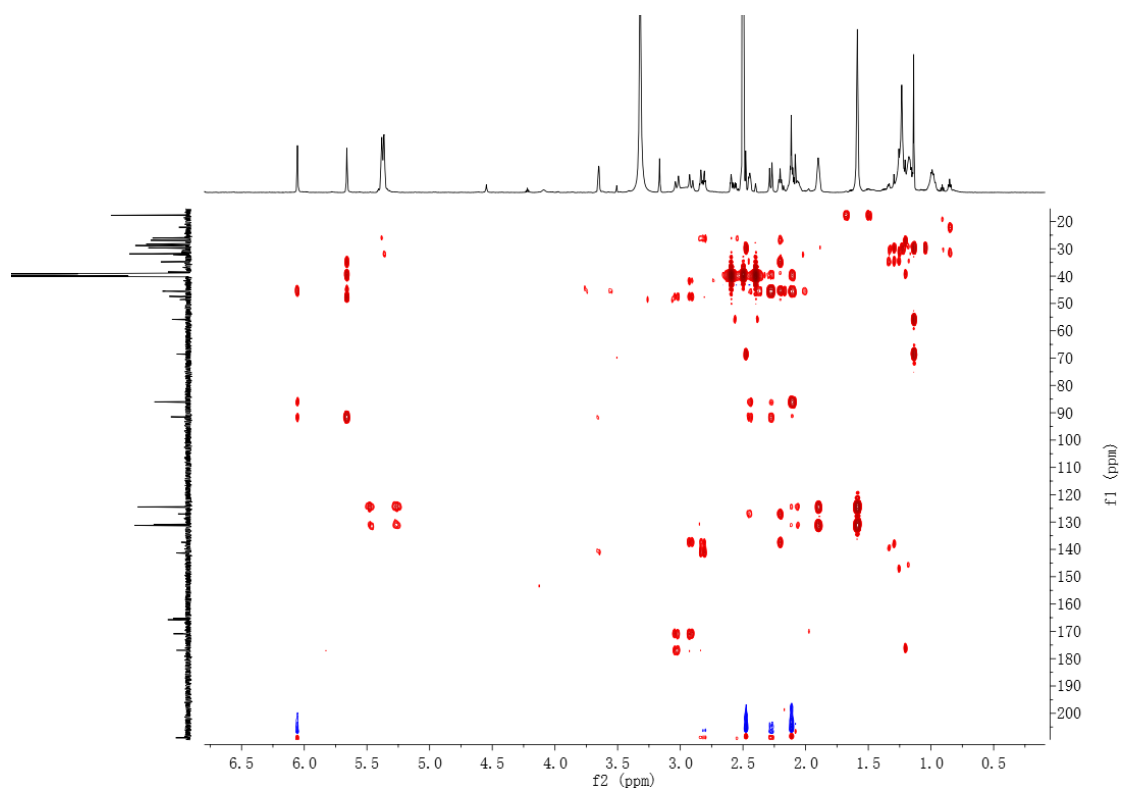

Fig. S15. HMBC (700 MHz, DMSO- $d_6$ ) spectrum for **1**

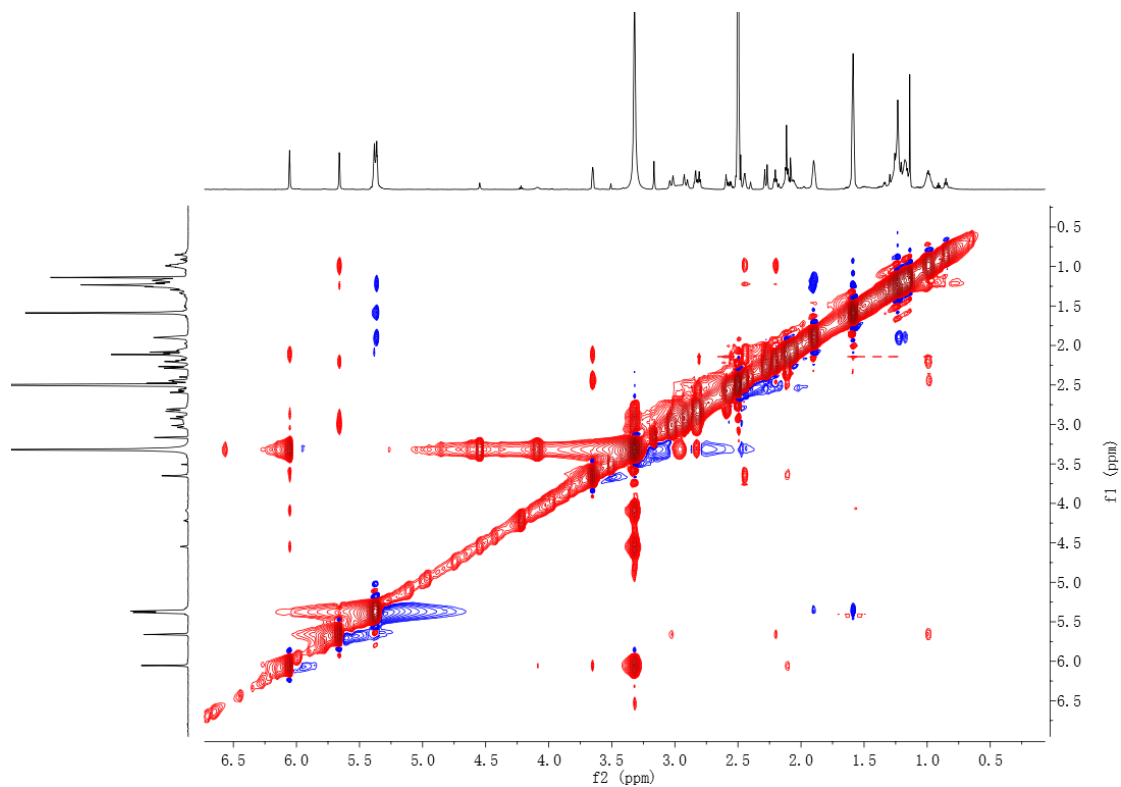

Fig. S16. NOESY (700 MHz, DMSO- $d_6$ ) spectrum for **1**

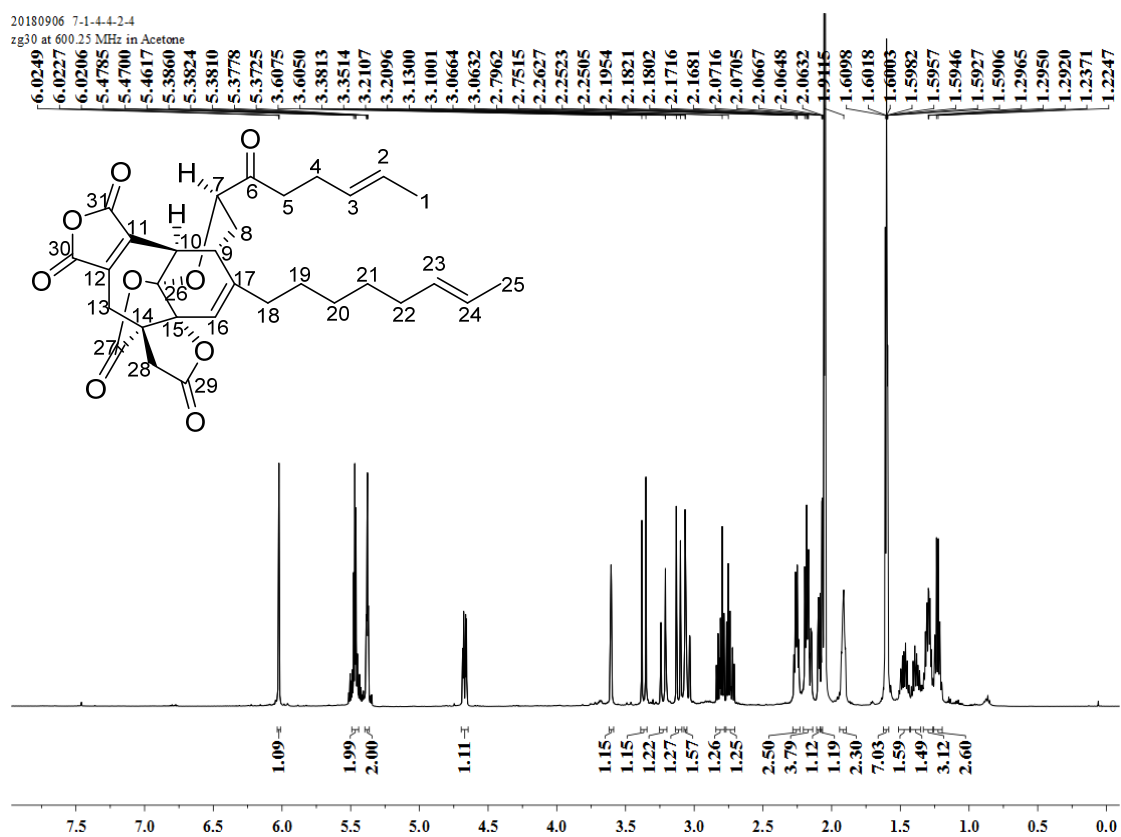

Fig. S17.  $^1\text{H}$  NMR (600 MHz, Acetone- $d_6$ ) spectrum for **2**

20180906 7-1-4-4-2-4  
zgpg30 at 150.95 MHz in Acetone

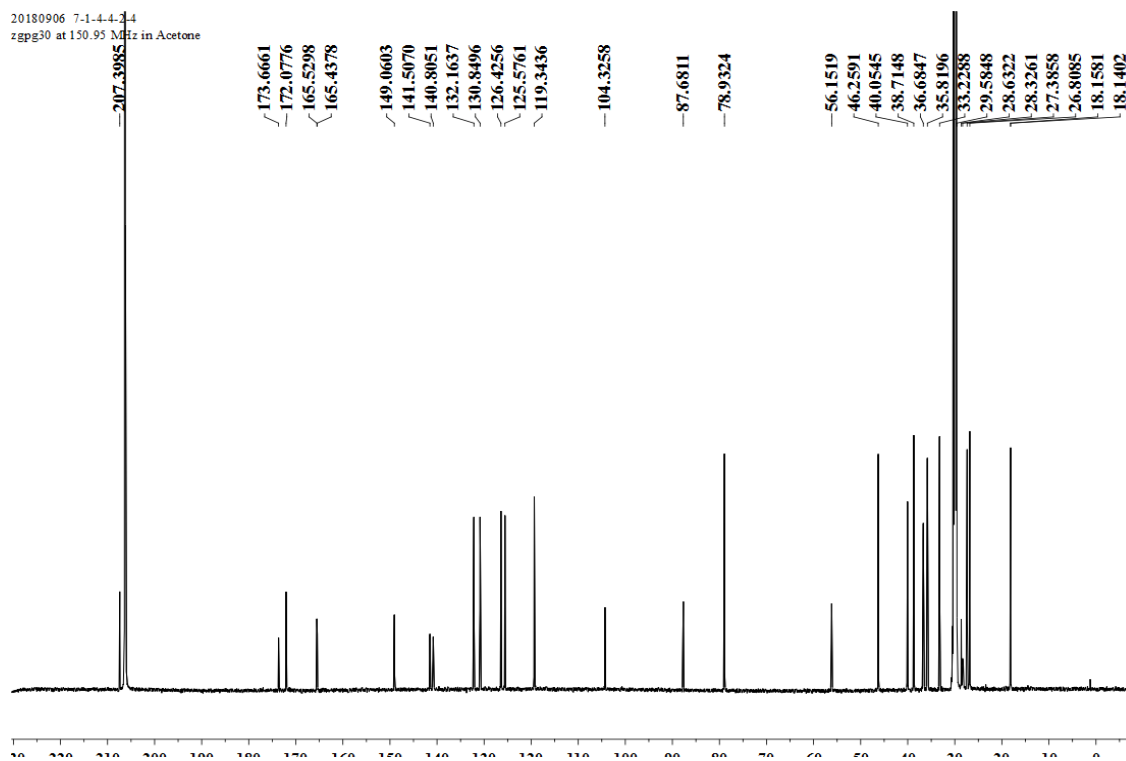

Fig. S18.  $^{13}\text{C}$  NMR (150 MHz, Acetone- $d_6$ ) spectrum for **2**

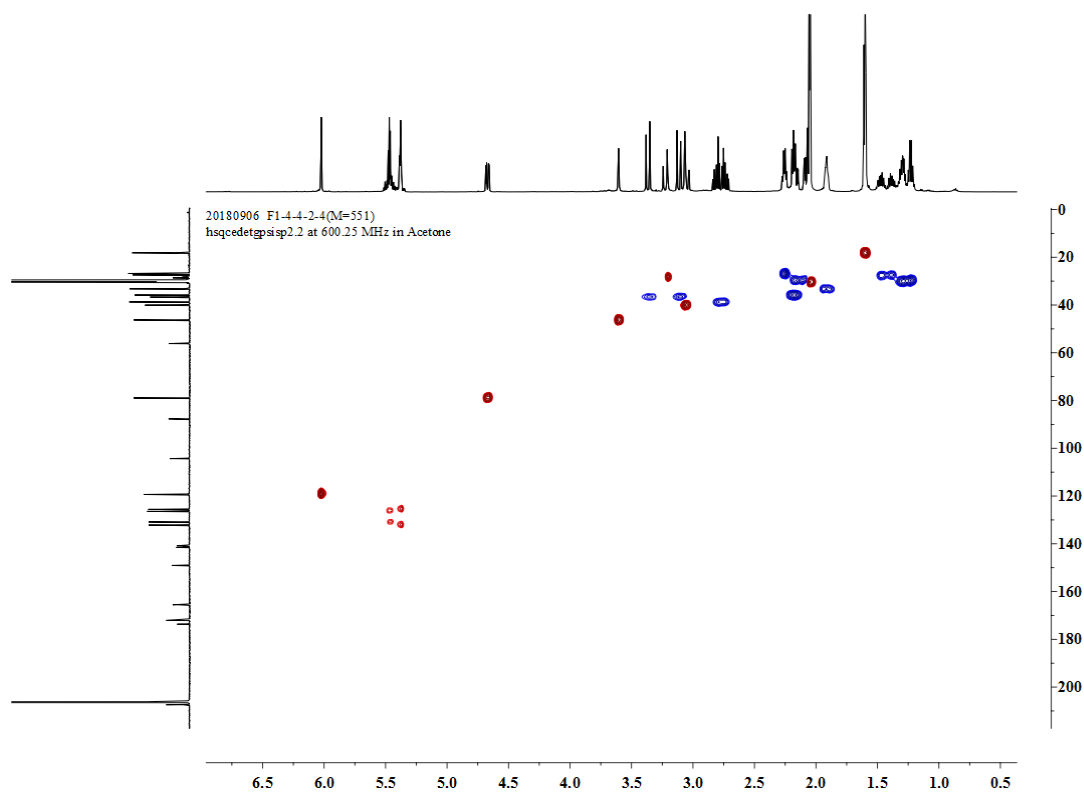

Fig. S19. HSQC (600 MHz, Acetone- $d_6$ ) spectrum for **2**



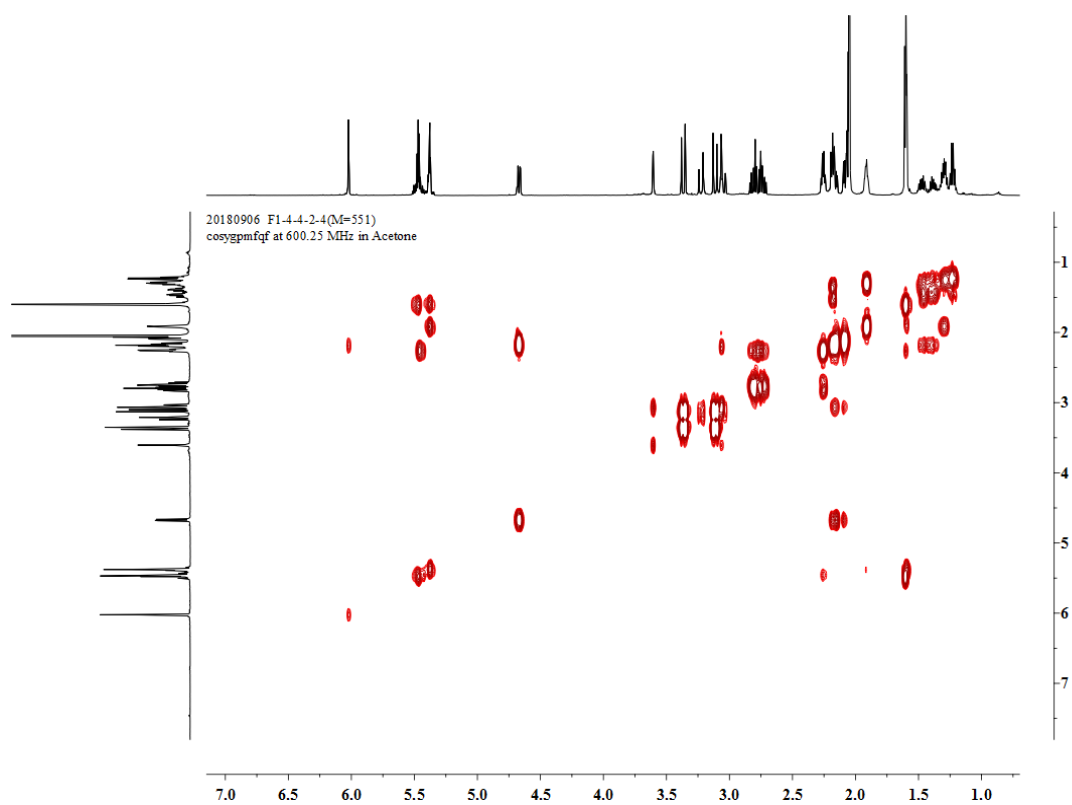

Fig. S20.  $^1\text{H}$ - $^1\text{H}$  COSY (600 MHz, Acetone- $d_6$ ) spectrum for **2**

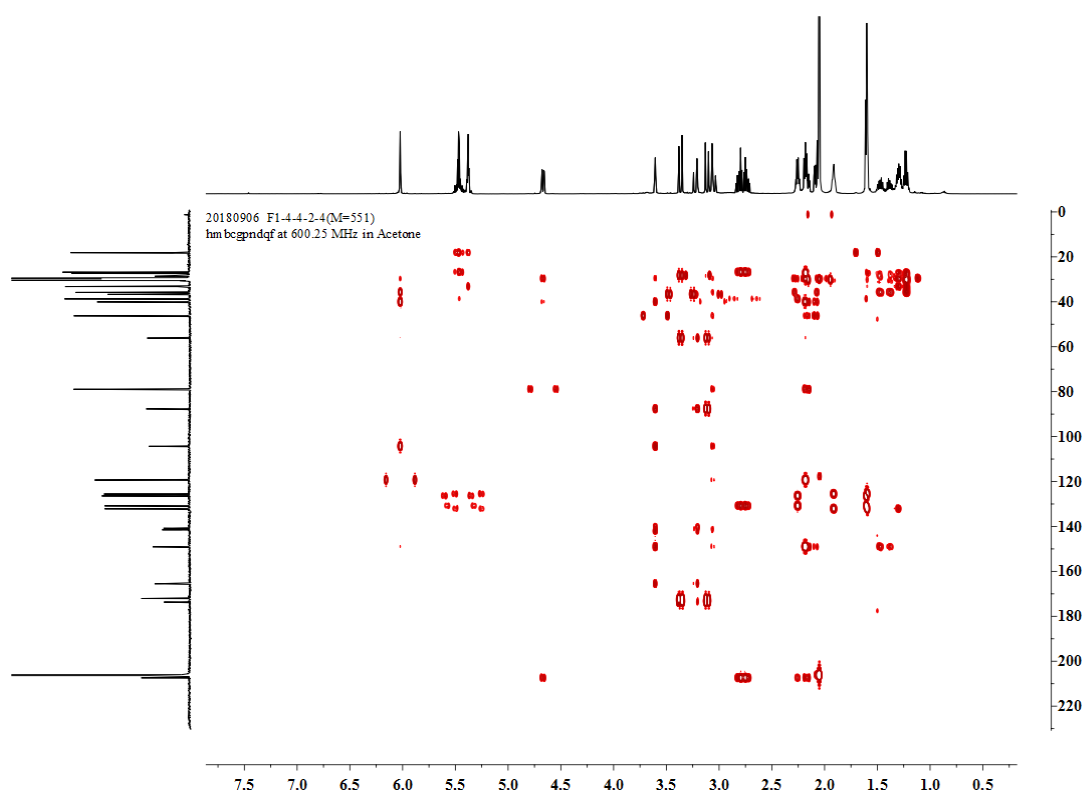

Fig. S21. HMBC (600 MHz, Acetone- $d_6$ ) spectrum for **2**

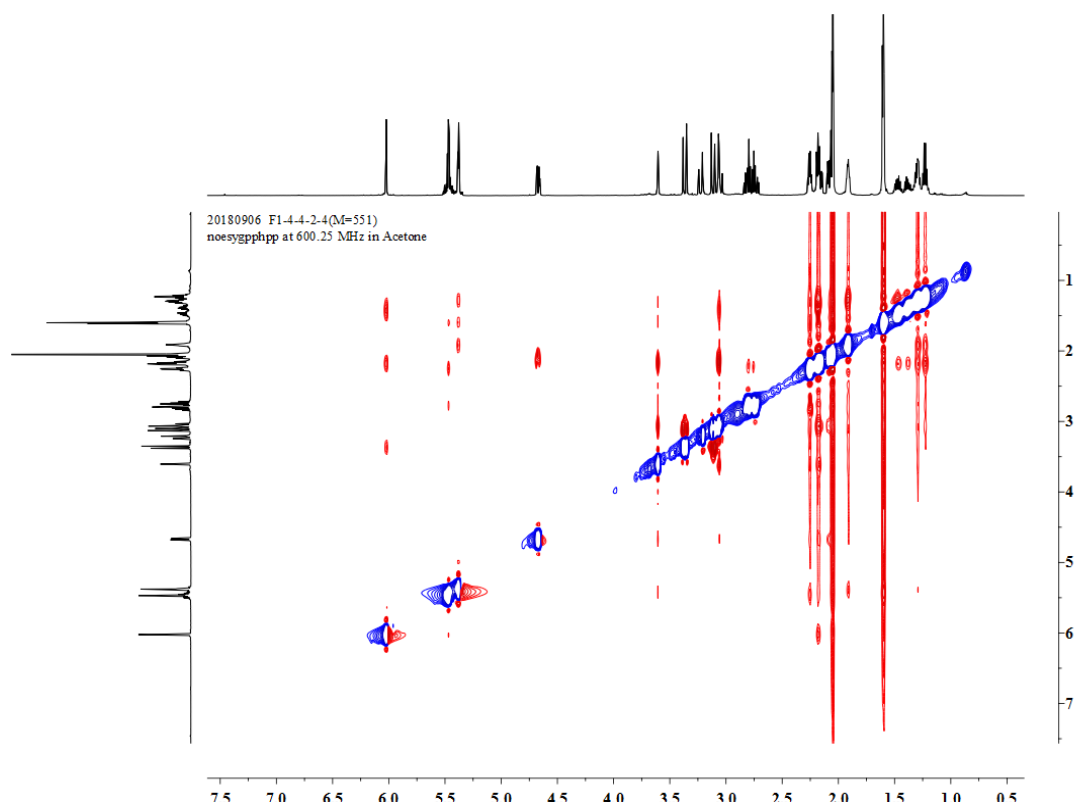

Fig. S22. NOESY (600 MHz, Acetone- $d_6$ ) spectrum for **2**

Thermo Qexactive Focus Report

compound NO. : F1-4-2-4  
 Method : LCMS(compound)-low

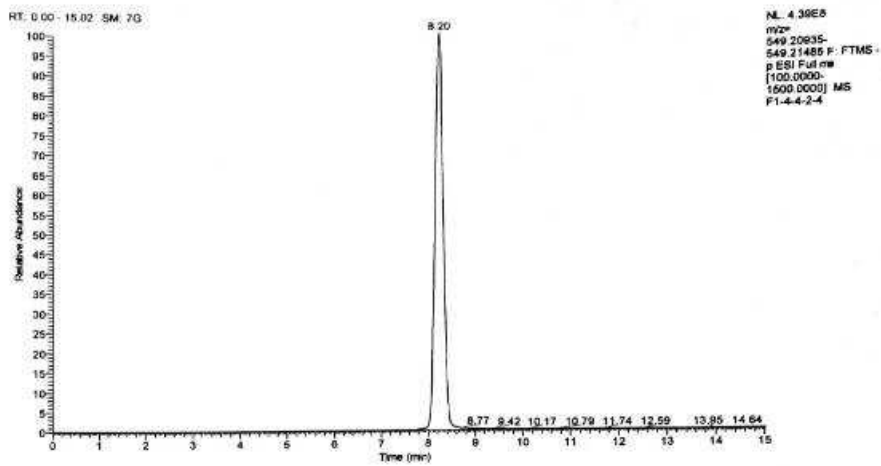

NL\_4\_38E6  
 m/z  
 549.21425 F: FTMS -  
 p ESI Full ms  
 [100.0000-  
 1500.0000] MS  
 F1-4-2-4

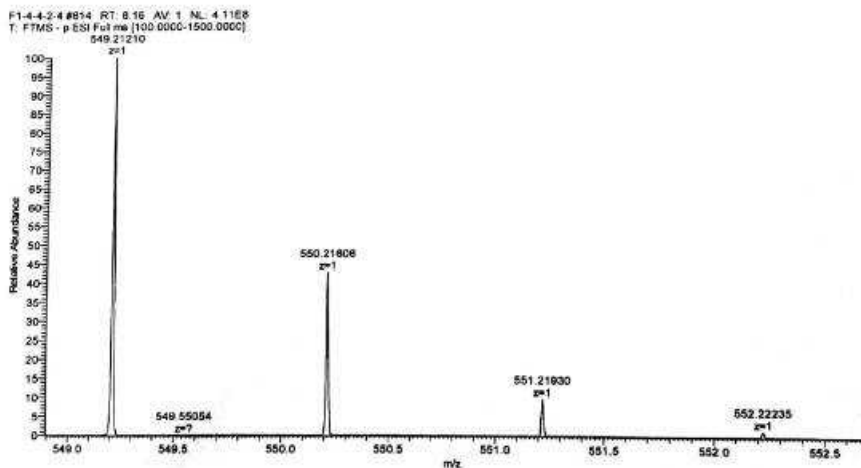

| m/z      | Theo. Mass | Delta (ppm) | RDB equiv. | Composition |     |
|----------|------------|-------------|------------|-------------|-----|
| 549.2121 | 549.21301  | -1.65       | 15.5       | C31 H33 O9  | M-H |

Fig. S23. HR-ESI-MS spectrum for 2

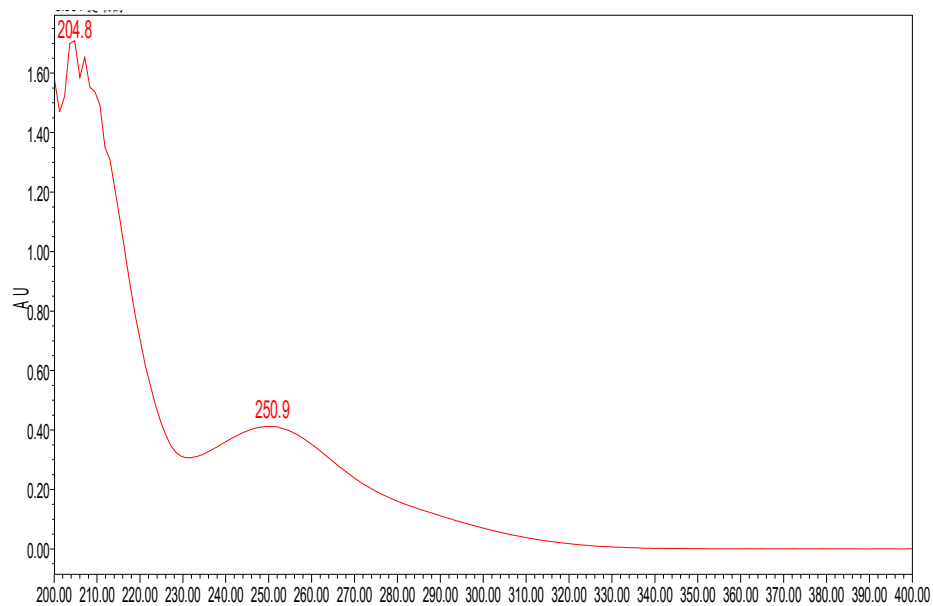

Fig. S24. UV spectrum for **2** in CH<sub>3</sub>CN

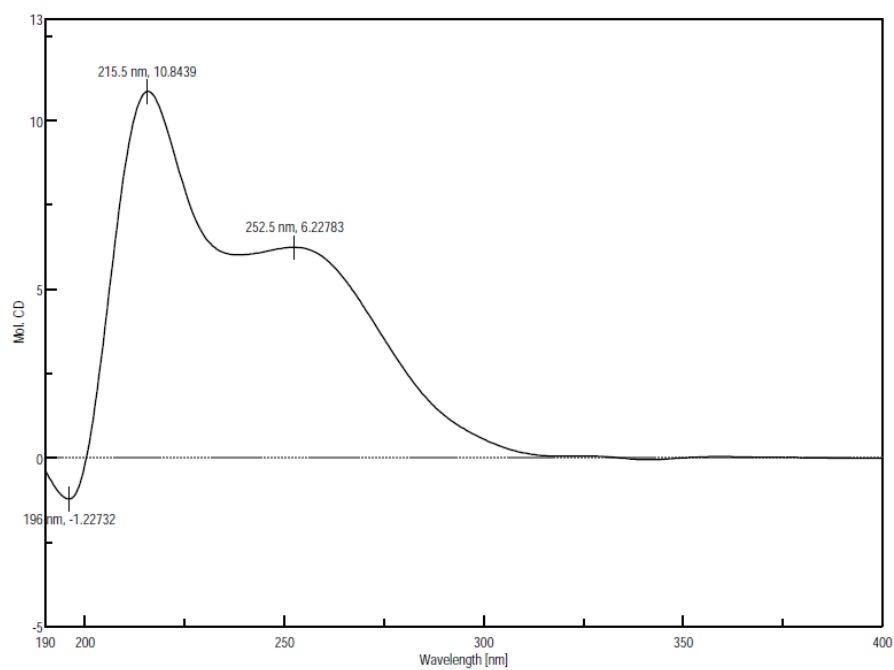

Fig. S25. CD spectrum for **2** in CH<sub>3</sub>CN

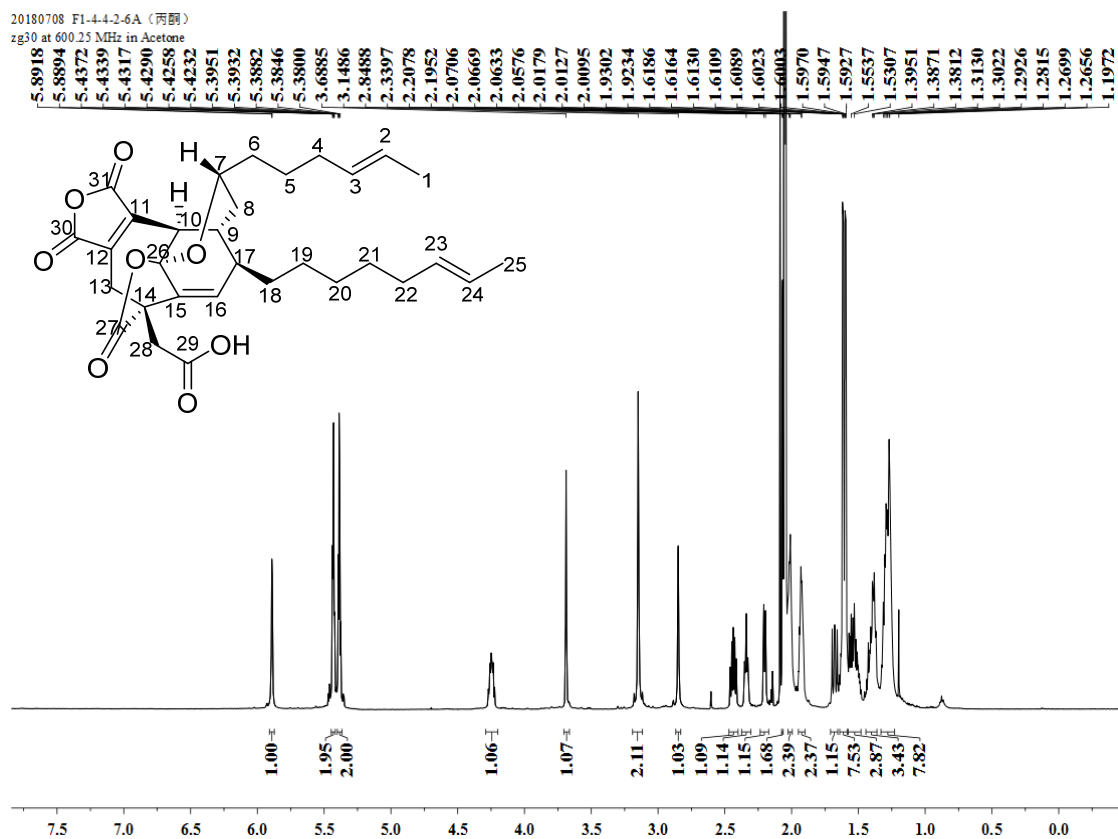

Fig. S26.  $^1\text{H}$  NMR (600 MHz, Acetone- $d_6$ ) spectrum for 3

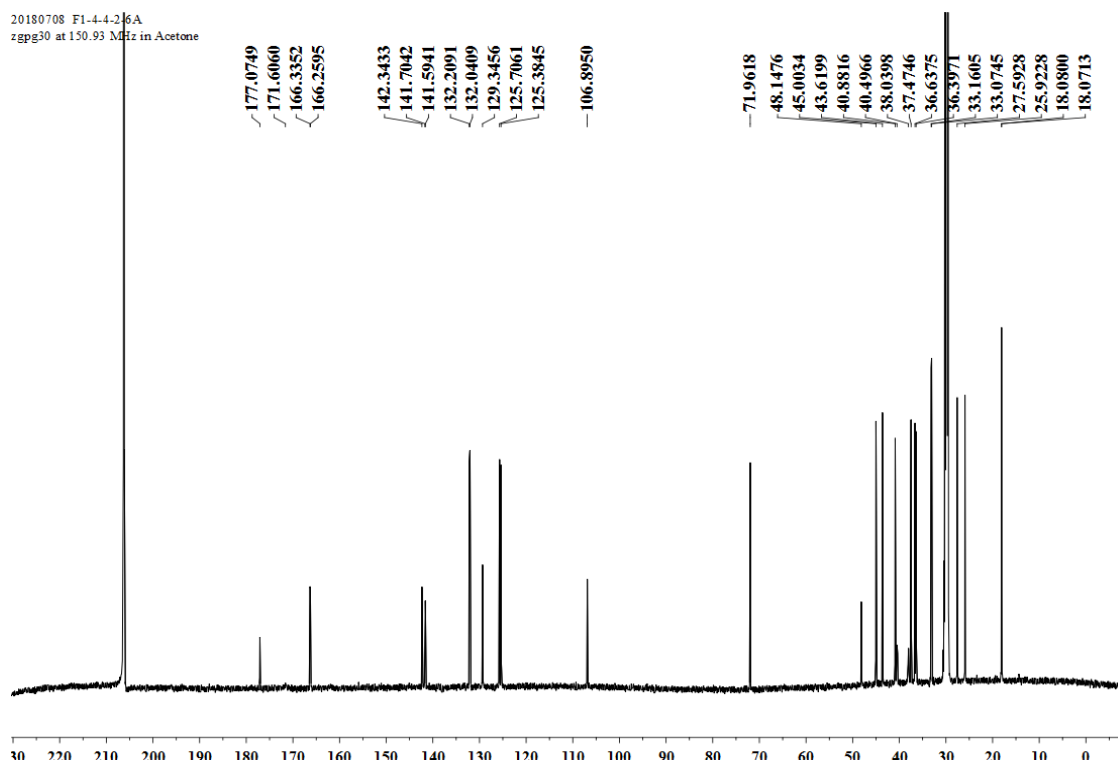

Fig. S27.  $^{13}\text{C}$  NMR (150 MHz, Acetone- $d_6$ ) spectrum for 3

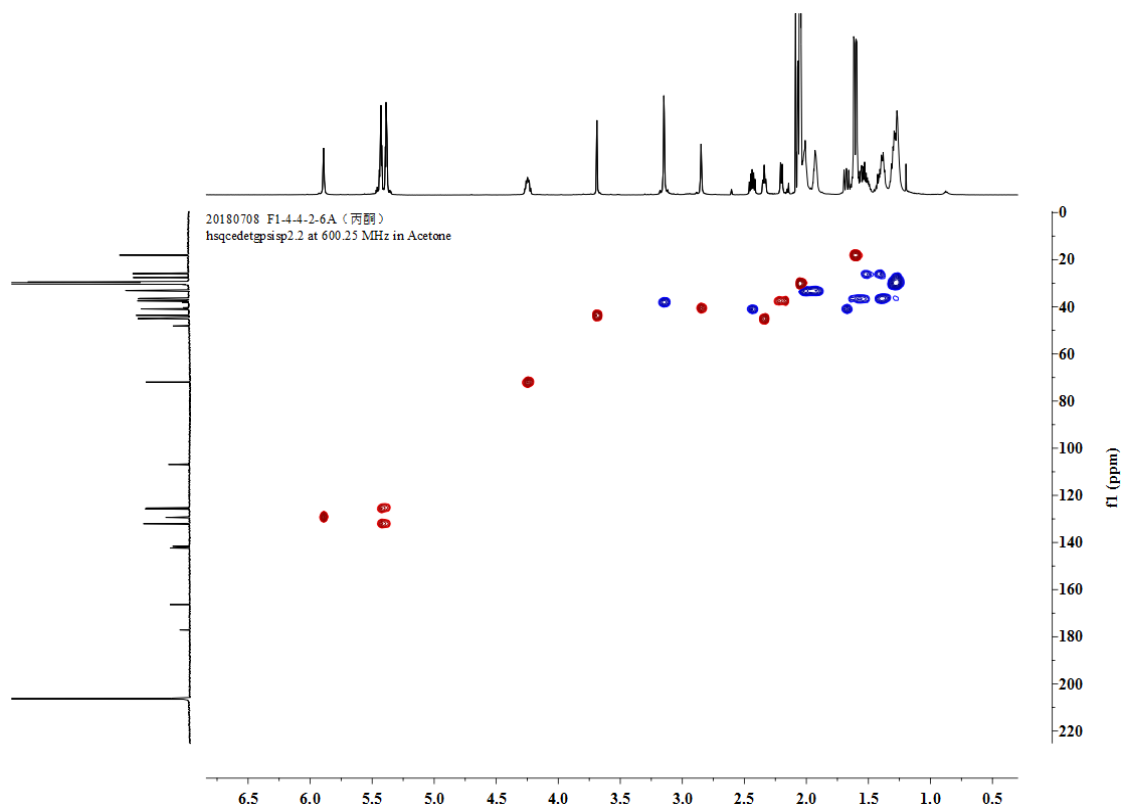

Fig. S28 HSQC (600 MHz, Acetone- $d_6$ ) spectrum for **3**

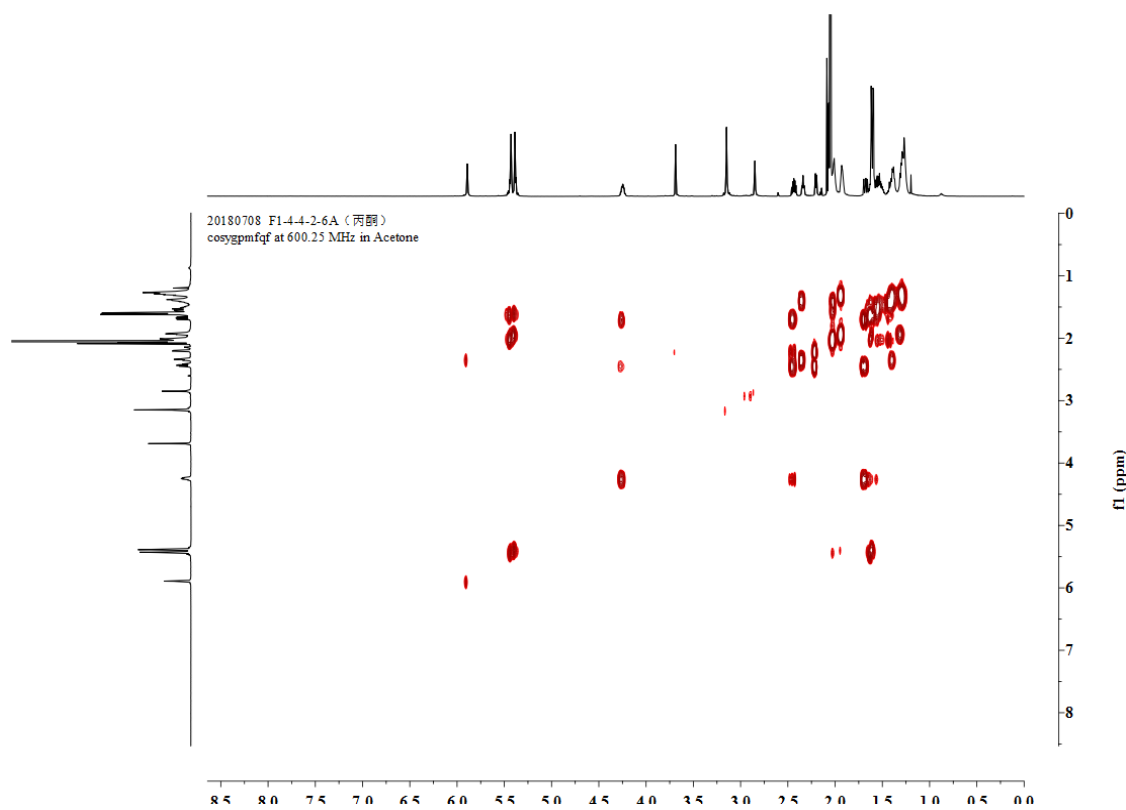

Fig. S29.  $^1\text{H}$ - $^1\text{H}$  COSY (600 MHz, Acetone- $d_6$ ) spectrum for **3**

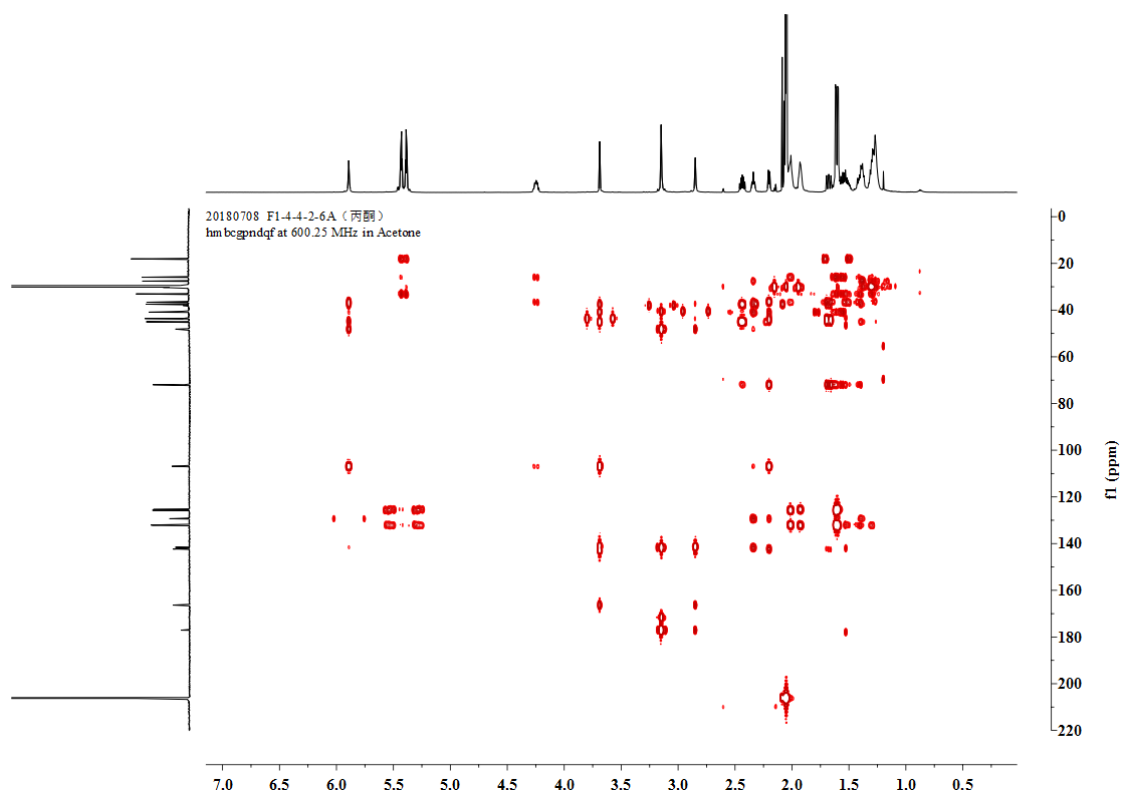

Fig. S30. HMBC (600 MHz, Acetone- $d_6$ ) spectrum for **3**

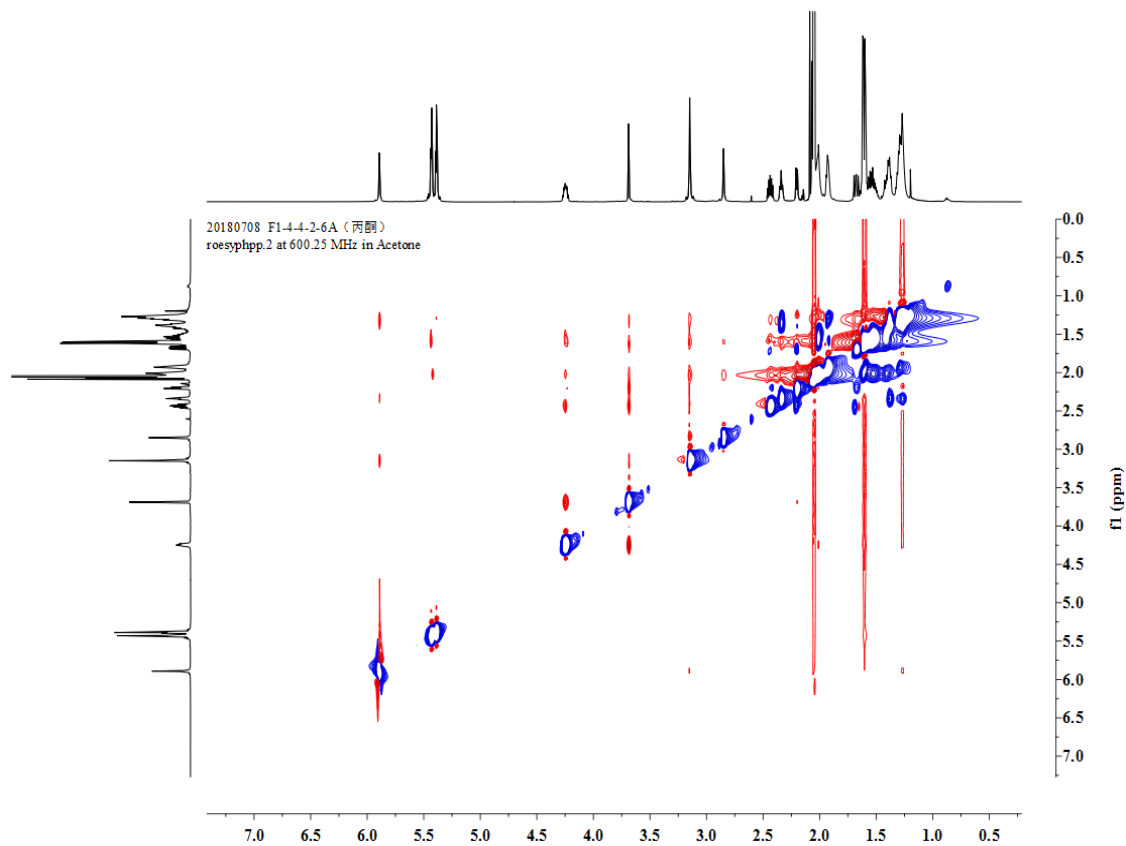

Fig. S31. NOESY (600 MHz, Acetone- $d_6$ ) spectrum for **3**

Thermo Qexactive Focus Report

compound NO. : F1-4-4-2-6A  
 Method : LCMS(compound)-low

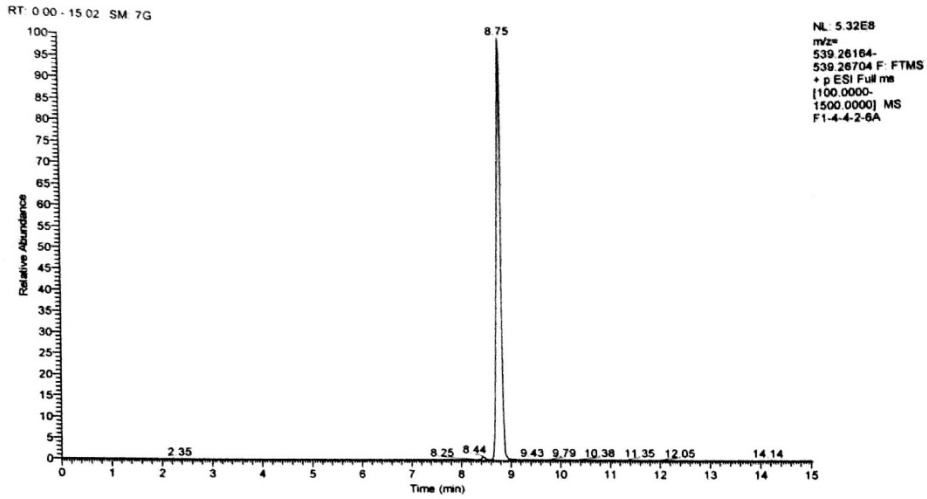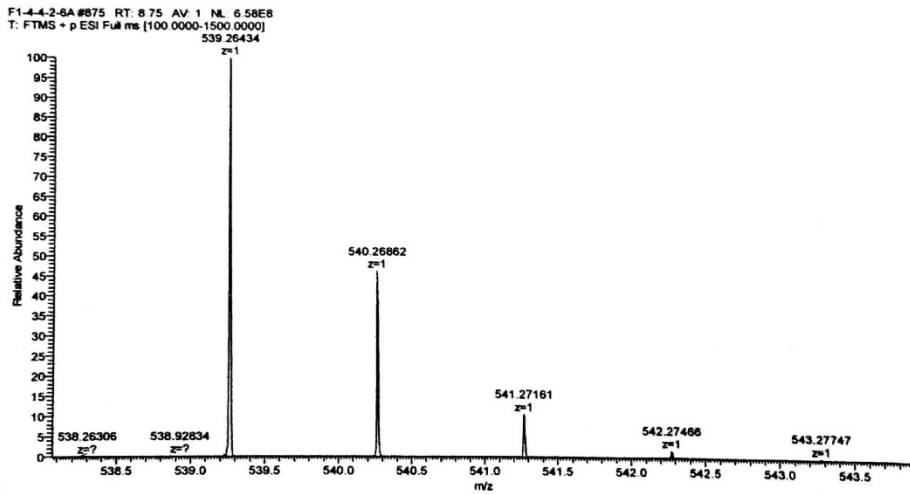

| m/z       | Theo. Mass | Delta (ppm) | RDB equiv. | Composition |     |
|-----------|------------|-------------|------------|-------------|-----|
| 539.26434 | 539.26394  | 0.73        | 12.5       | C31 H39 O8  | M+H |

Fig. S32. HR-ESI-MS spectrum for 3



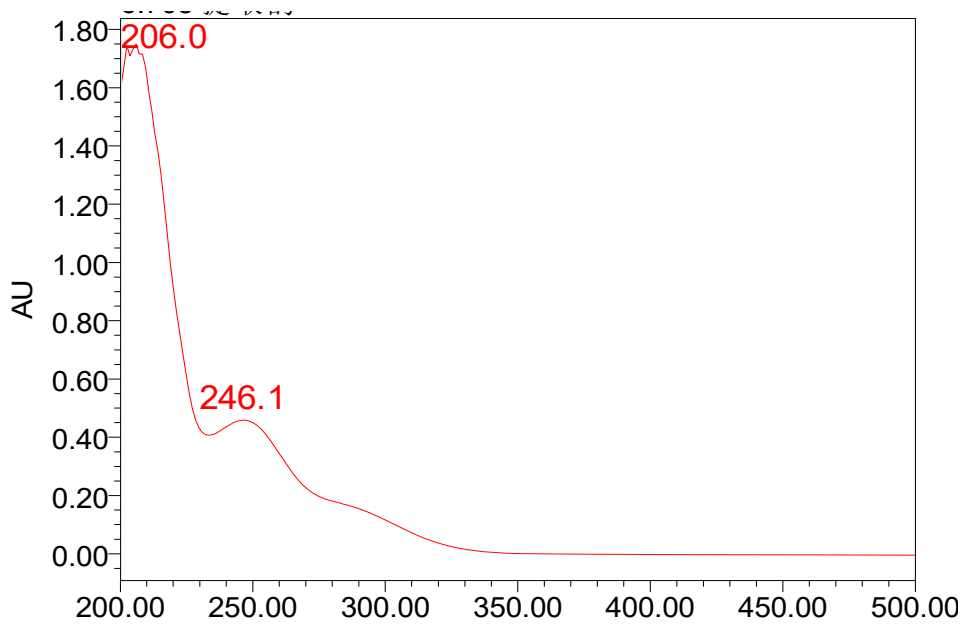

Fig. S33. UV spectrum for **3** in CH<sub>3</sub>CN

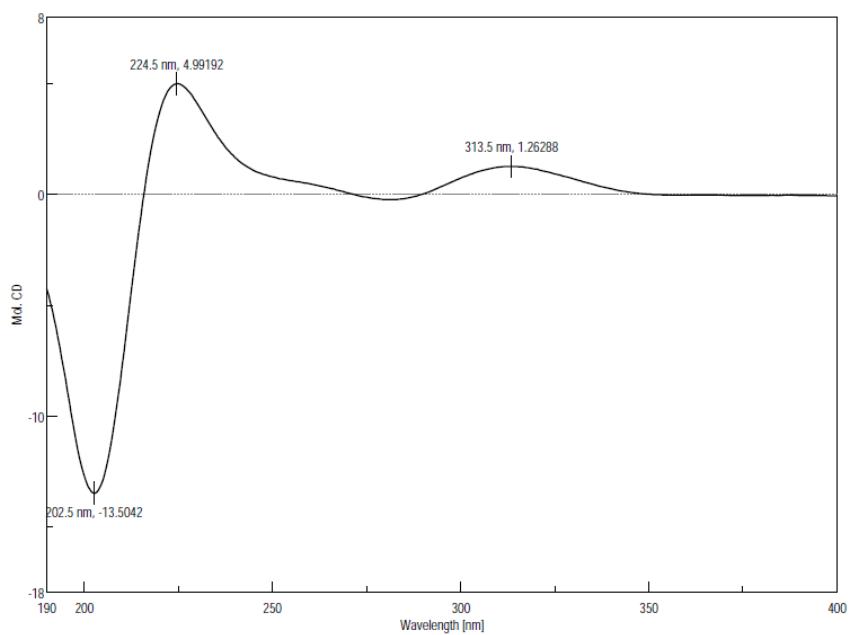

Fig. S34. CD spectrum for **3** in CH<sub>3</sub>CN

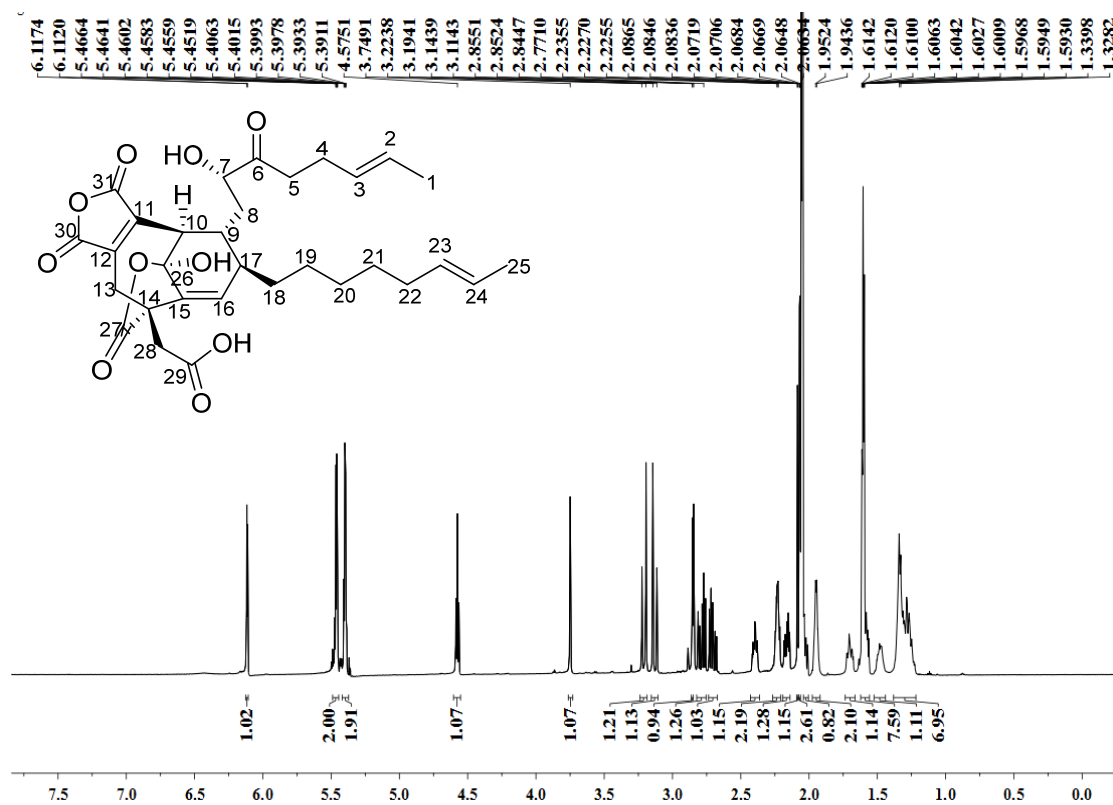

Fig. S35. <sup>1</sup>H NMR (600 MHz, Aceton-*d*<sub>6</sub>) spectrum for Phomoidride A

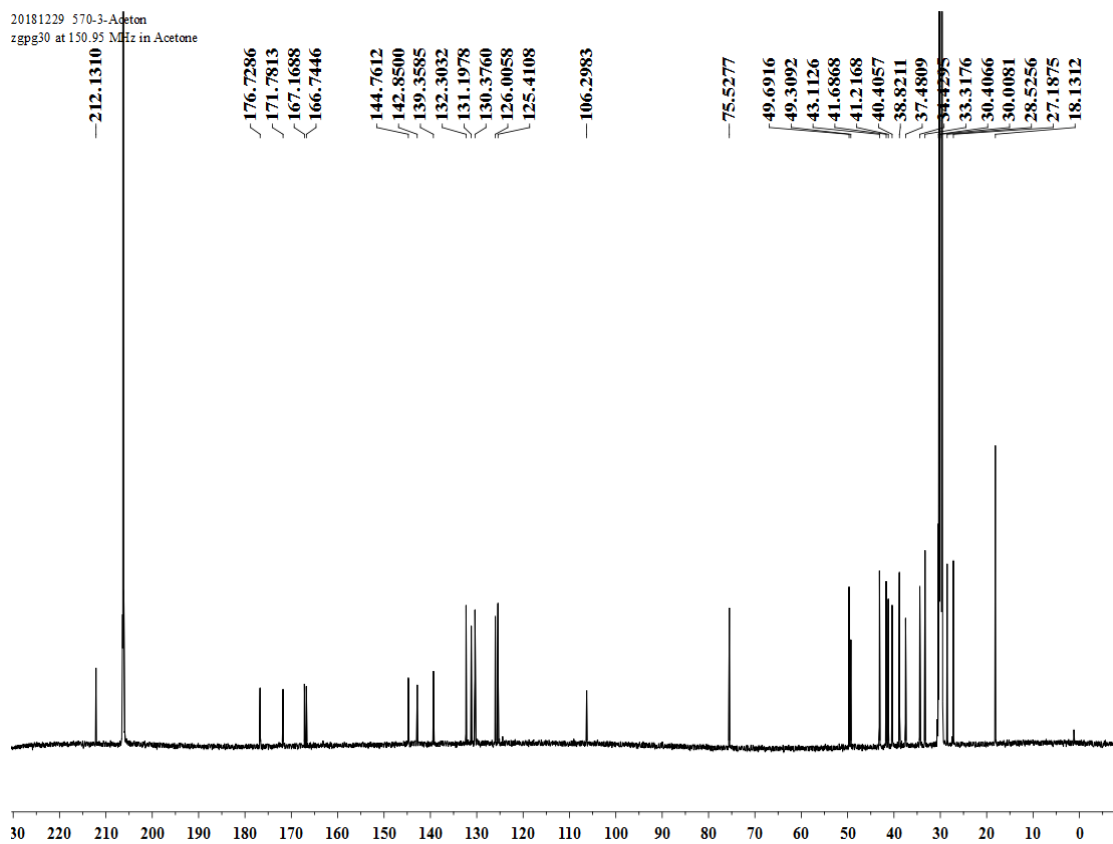

Fig. S37. <sup>13</sup>C NMR (150 MHz, Aceton-*d*<sub>6</sub>) spectrum for Phomoidride A

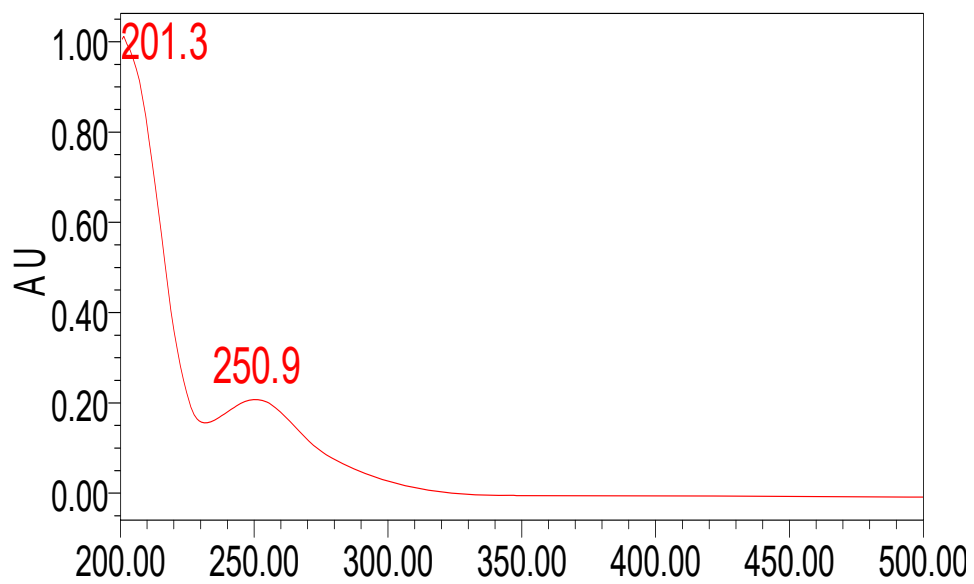

Fig. S38. UV spectrum for Phomoidride A in CH<sub>3</sub>CN

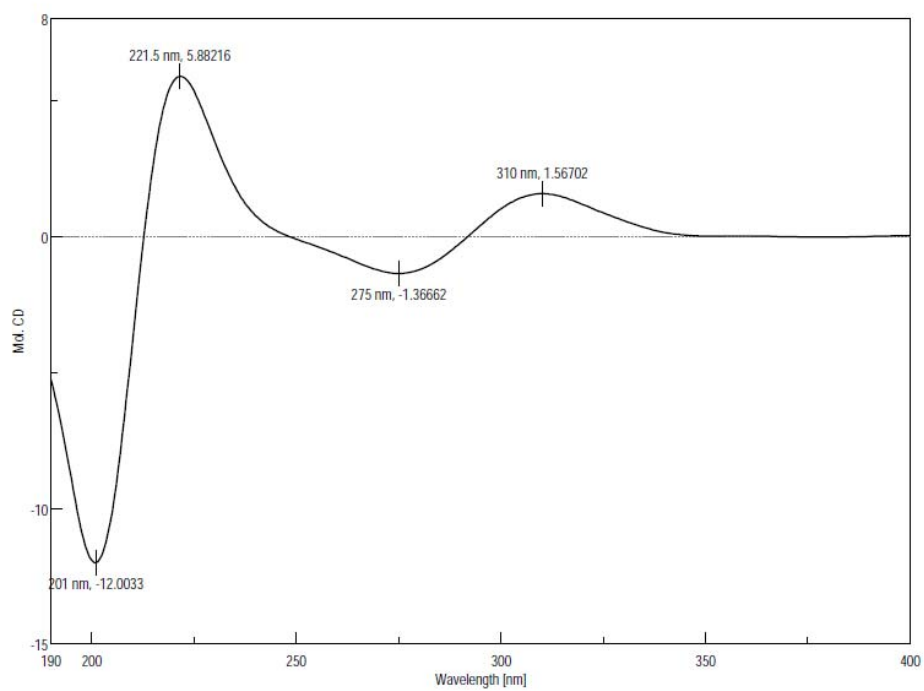

Fig. S39. CD spectrum for Phomoidride A in CH<sub>3</sub>CN

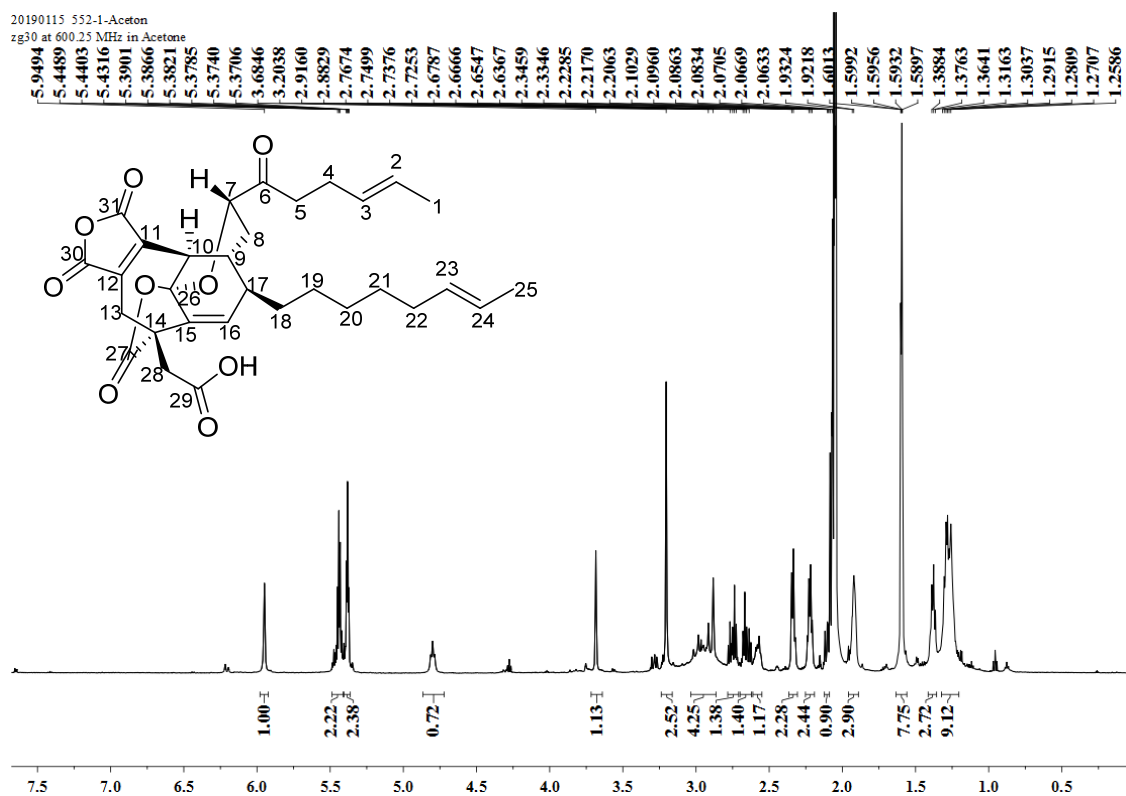

Fig. S40.  $^1\text{H}$  NMR (600 MHz, Aceton- $d_6$ ) spectrum for Phomoidride B

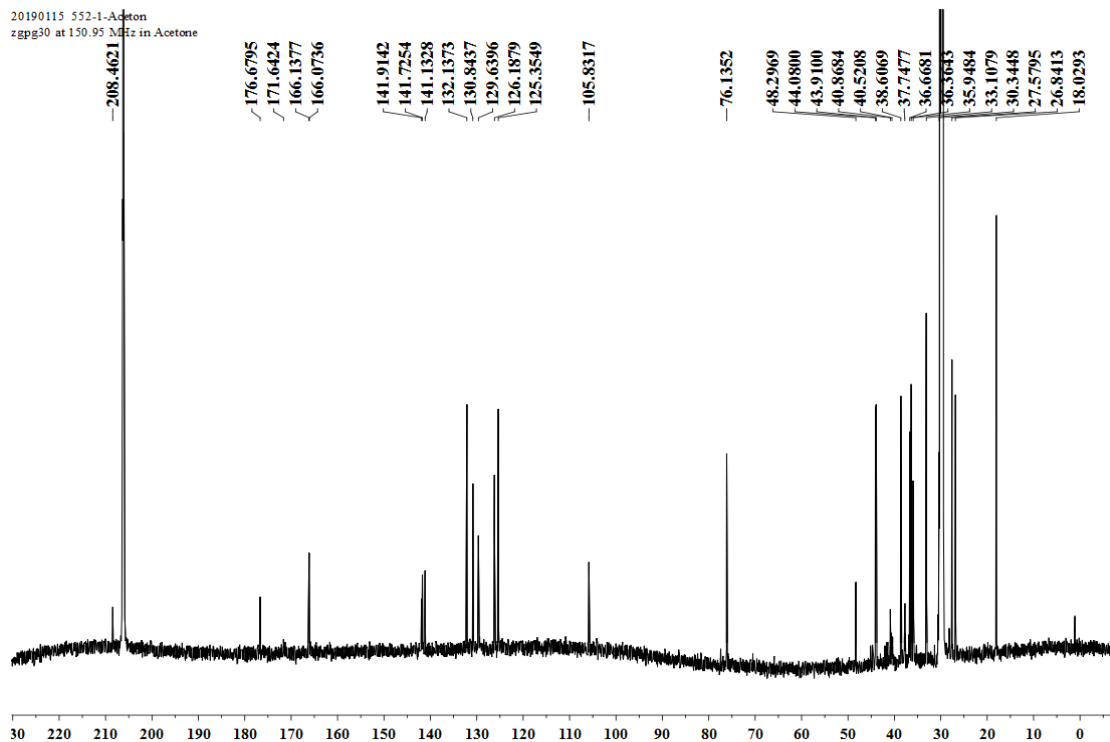

Fig. S41.  $^{13}\text{C}$  NMR (150 MHz, Aceton- $d_6$ ) spectrum for Phomoidride B

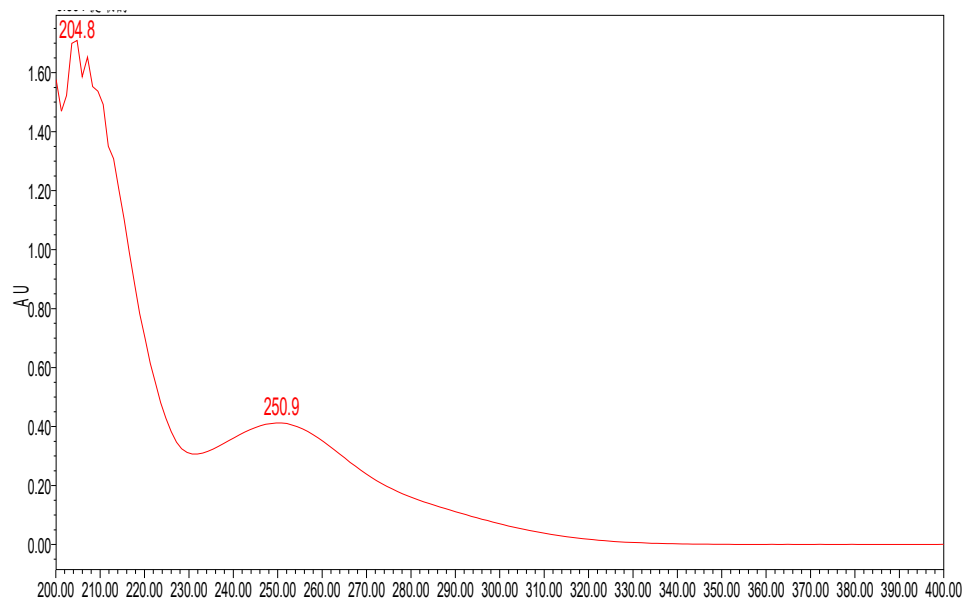

Fig. S42. UV spectrum for Phomoidride B in CH<sub>3</sub>CN

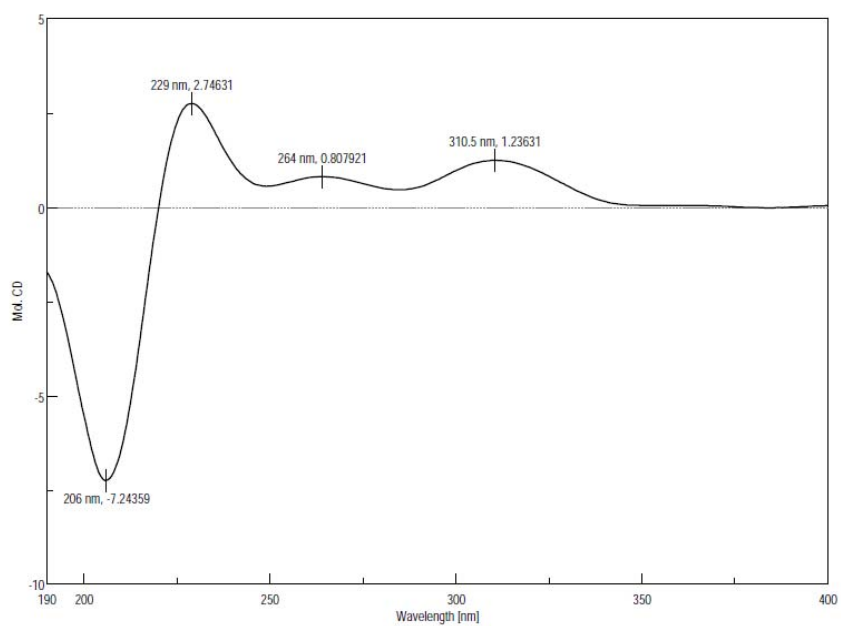

Fig. S43. CD spectrum for Phomoidride B in CH<sub>3</sub>CN

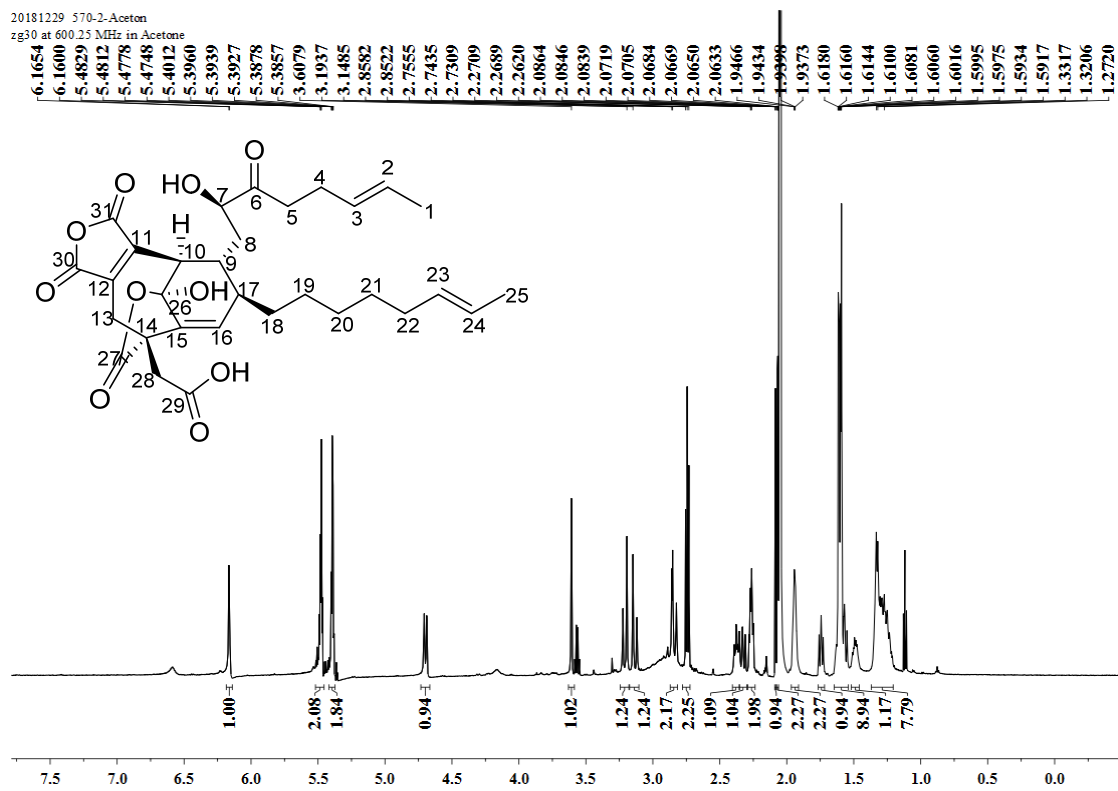

Fig. S44.  $^1\text{H}$  NMR (600 MHz, Aceton- $d_6$ ) spectrum for Phomoidride C

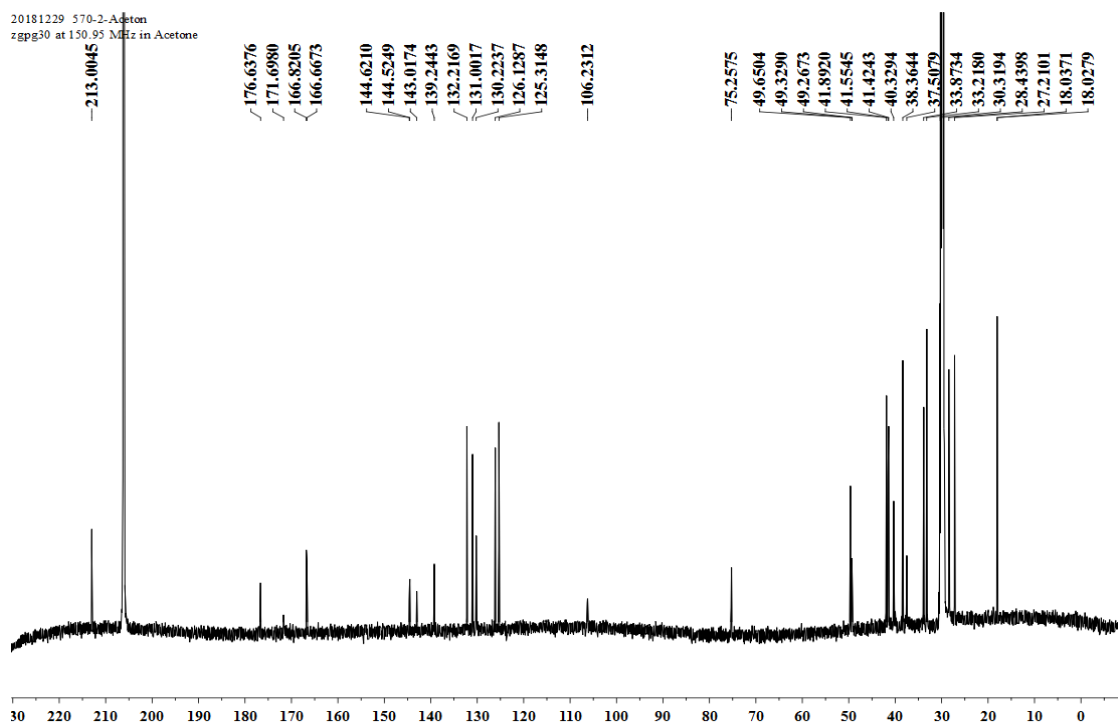

Fig. S45.  $^{13}\text{C}$  NMR (150 MHz, Aceton- $d_6$ ) spectrum for Phomoidride C

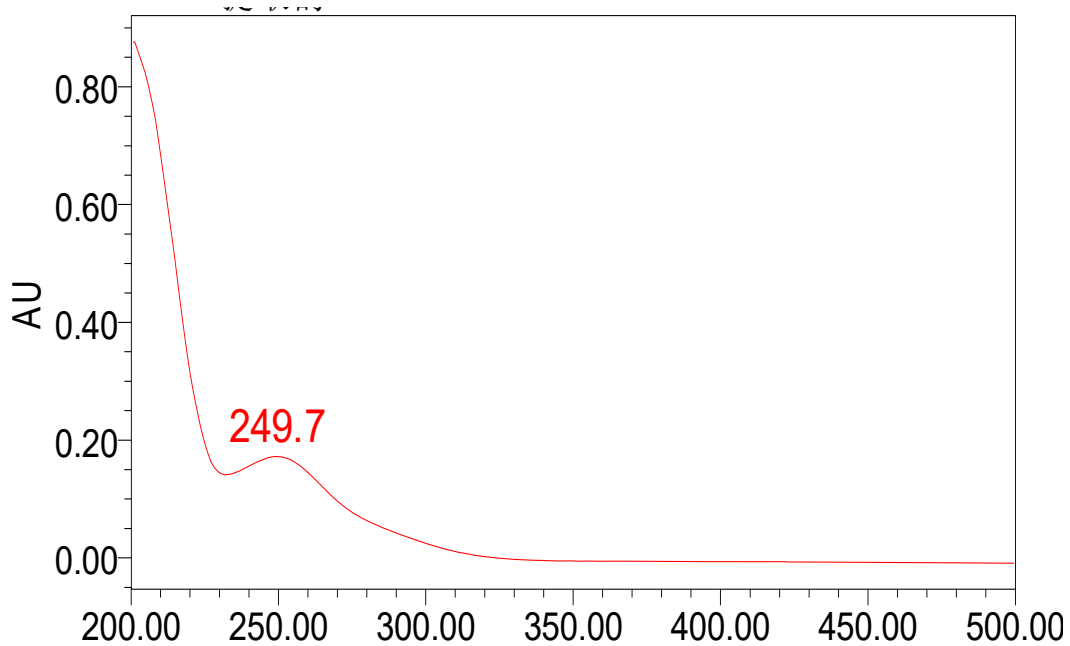

Fig. S46. UV spectrum for Phomoidride C in  $\text{CH}_3\text{CN}$

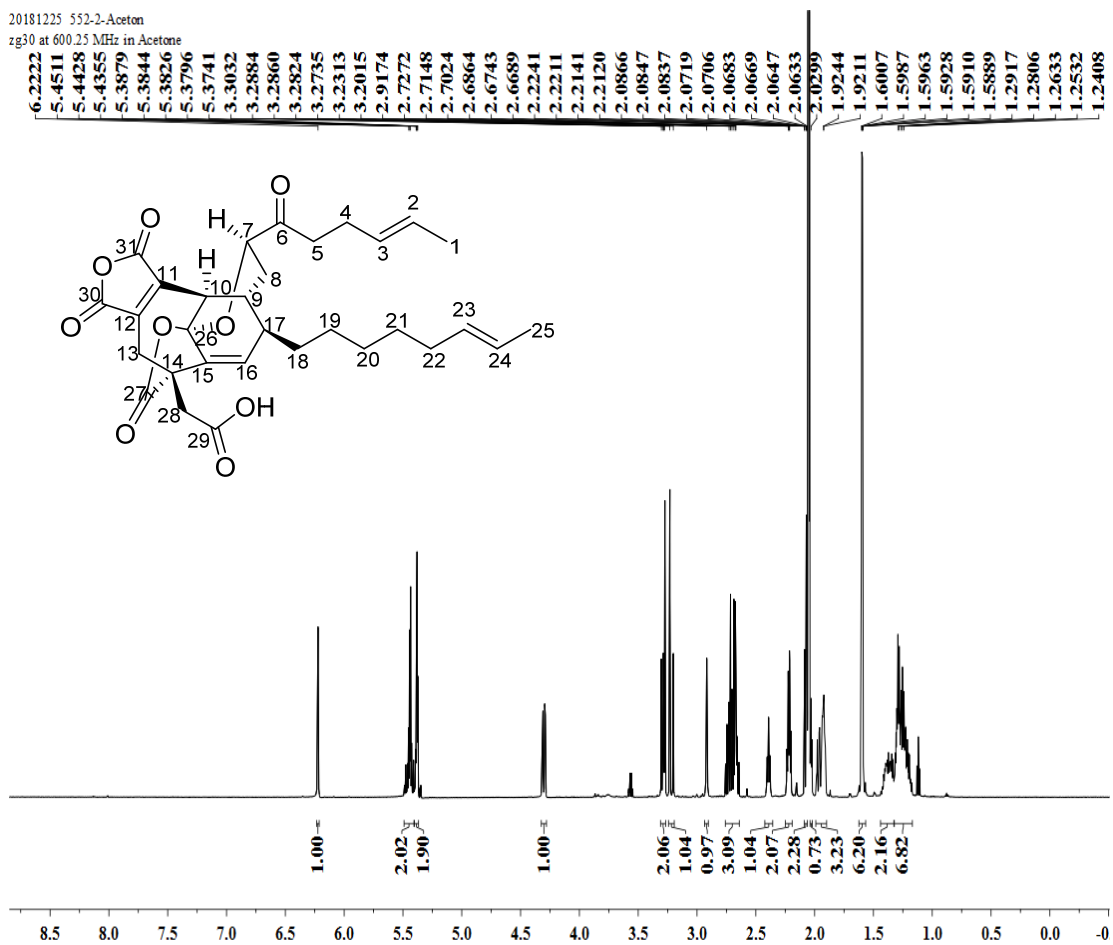

Fig. S47.  $^1\text{H}$  NMR (600 MHz, Aceton- $d_6$ ) spectrum for Phomoidride D

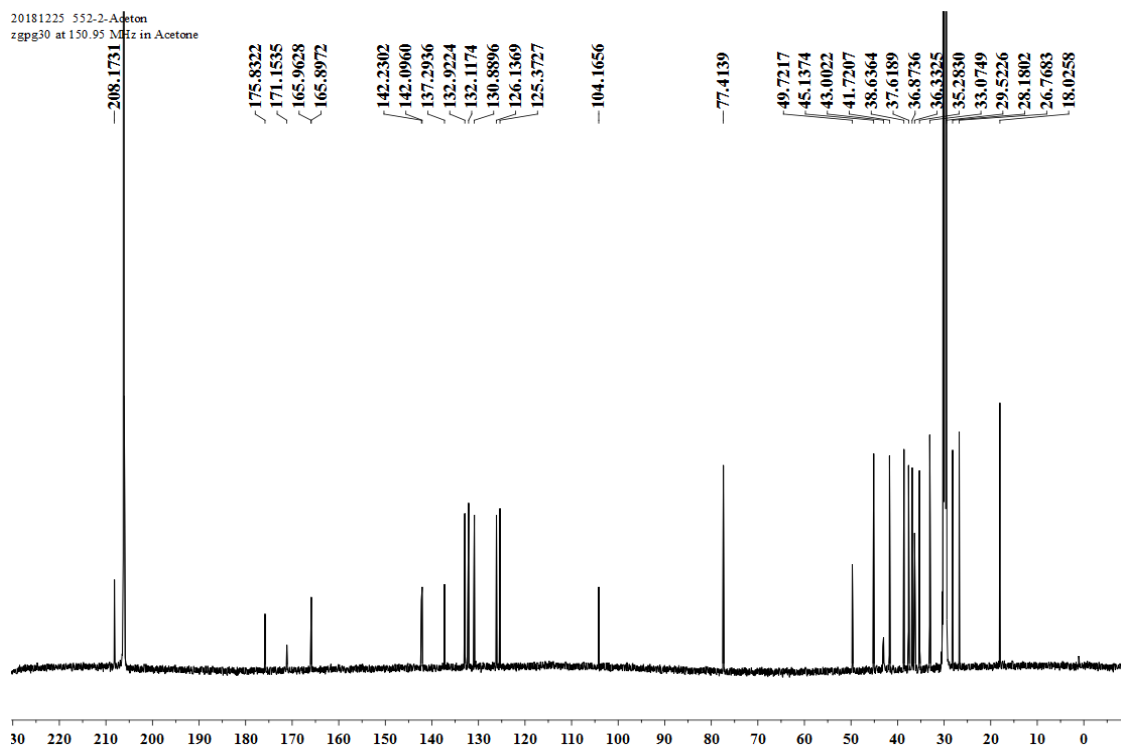

Fig. S48.  $^{13}\text{C}$  NMR (150 MHz, Aceton- $d_6$ ) spectrum for Phomoidride D

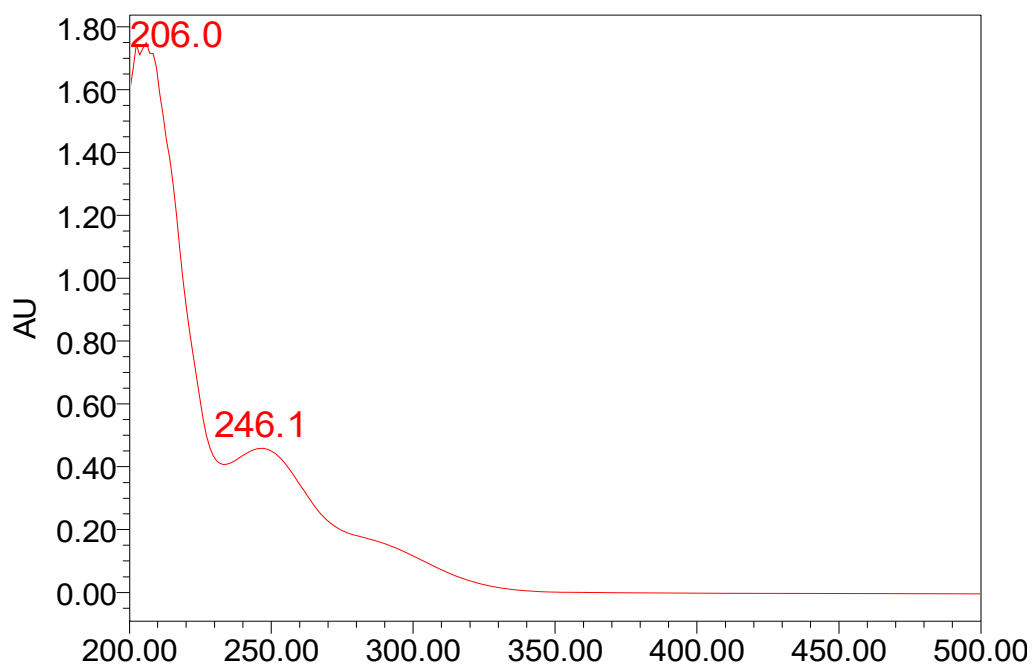

Fig. S49. UV spectrum for Phomoidride D in  $\text{CH}_3\text{CN}$



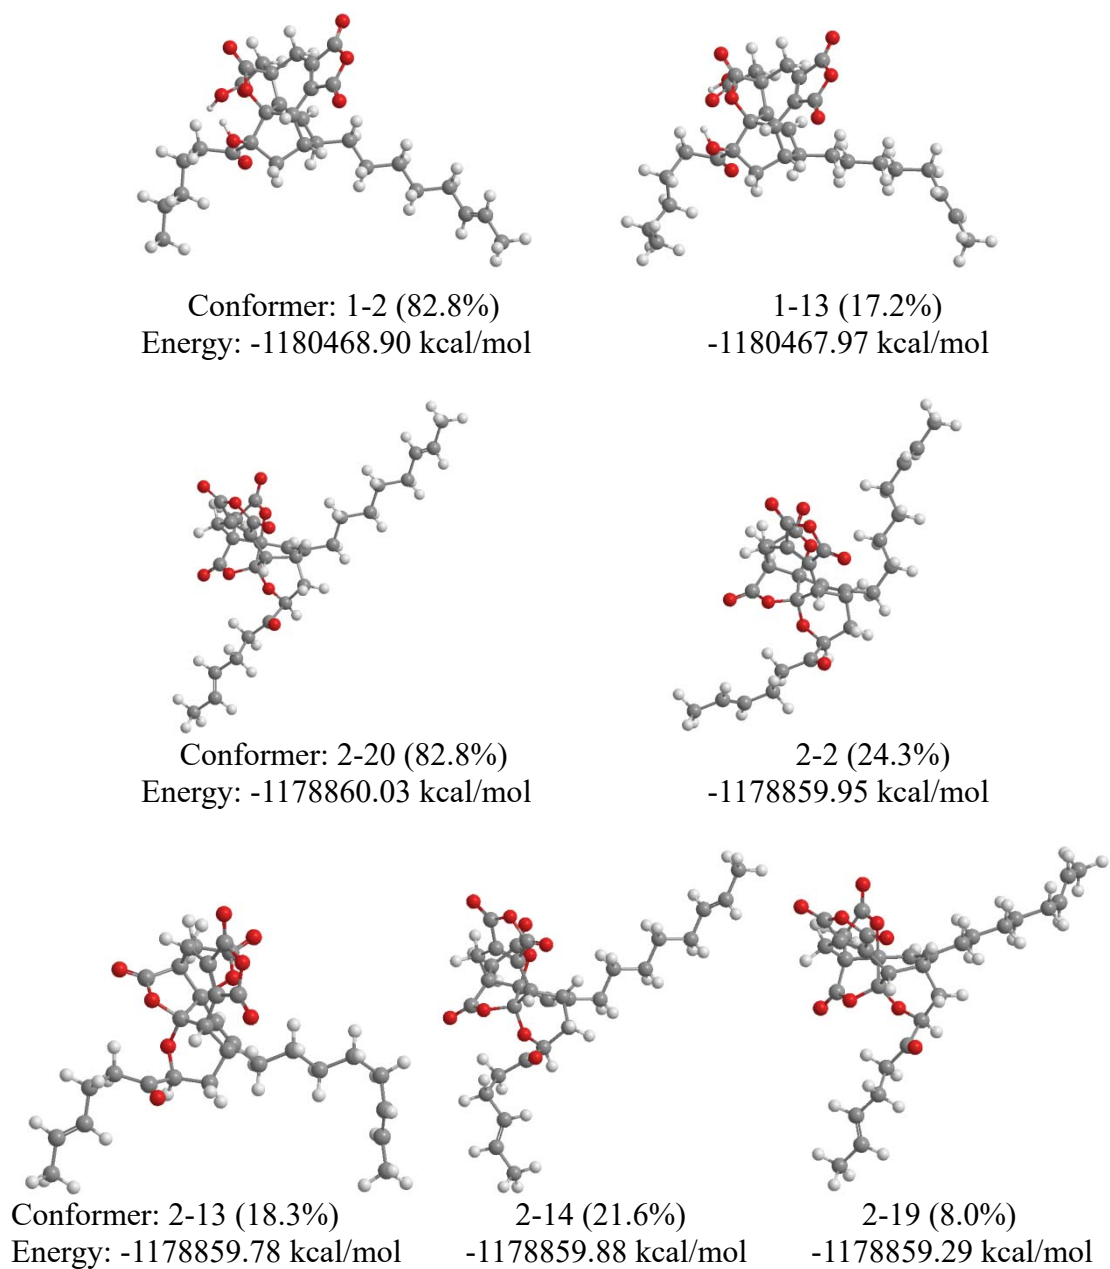

Fig. S50. 3D conformers and energies of **1** and **2** at B3LYP/6-31G(d) level in gas phase.
